# Supplementary material
Source: MDPI journal article supplement (https://www.mdpi.com/2078-1547/6/1/117)
Supplement: s1 [file s1]

## Sheet: Traffic
	2010	2011	2012	2013	2014	2015	2016	2017	2018	2019	2020	2021	2022	2023	2024	2025	2026	2027	2028	2029	2030
Mobile Data traffic (EB/year), best	3.84	6.48	10.8	19.2	33.6	56.4	88.8	134.4	212.352	335.516	530.116	757.948	1059.1	1477.9	2061.73	2876.89	4194.08	5944.97	8313.65	11556.6	16032
Mobile Data traffic (EB/year), expected	3.84	6.48	10.8	19.2	33.6	56.4	88.8	134.4	212.352	335.516	530.116	810.748	1209.35	1805.83	2699.18	4037.91	6156.43	9271.57	13884.8	20748.2	30989.7
Mobile Data traffic (EB/year), worst	3.84	6.48	10.8	19.2	33.6	56.4	88.8	134.4	212.352	335.516	530.116	850.876	1357.06	2167.37	3464.27	5539.72	8822.34	14097.6	22561.3	36127	57856
2G/3G mobile voice traffic (EB/year)	18.7482	18.7482	18.7482	18.7482	18.7482	18.7482	18.7482	18.7482	18.7482	18.7482	18.7482	18.7482	18.7482	18.7482	18.7482	18.7482	18.7482	18.7482	18.7482	18.7482	18.7482
Fixed Access Wired Data traffic (EB/year), best, 13%CAGR	207	236	270	305.1	344.763	389.582	440.228	497.457	562.127	635.203	717.78	811.091	916.533	1035.68	1170.32	1322.46	1494.38	1688.65	1908.18	2156.24	2436.55
Fixed Access Wi-Fi Data Traffic (EB/year), best, 25%CAGR	118	154	200	250	312.5	390.625	488.281	610.352	762.939	953.674	1192.09	1490.12	1862.65	2328.31	2910.38	3637.98	4547.47	5684.34	7105.43	8881.78	11102.2
Fixed total best (EB/year)	325	390	470	555.1	657.263	780.207	928.509	1107.81	1325.07	1588.88	1909.87	2301.21	2779.18	3363.99	4080.7	4960.44	6041.86	7372.99	9013.61	11038	13538.8	EB
Fixed Access Wired Data traffic (EB/year), expected 14% CAGR	207	236	270	307.8	350.892	400.017	458	522.12	595.217	678.547	773.544	881.84	1005.3	1146.04	1306.48	1489.39	1697.91	1935.61	2206.6	2515.52	2867.7
Fixed Access Wi-Fi Data Traffic (EB/year), expected, 30% CAGR	118	154	200	260	338	439.4	585	760.5	988.65	1285.25	1670.82	2172.06	2823.68	3670.79	4772.02	6203.63	8064.72	10484.1	13629.4	17718.2	23033.7
Fixed total expected (EB/year)	325	390	470	567.8	688.892	839.417	1043	1282.62	1583.87	1963.79	2444.36	3053.9	3828.98	4816.83	6078.51	7693.02	9762.63	12419.8	15836	20233.7	25901.3	EB
Fixed Access Wired Data traffic (EB/year), worst, 15%CAGR	207	236	270	310.5	357.075	410.636	472.232	543.066	624.526	718.205	825.936	949.827	1092.3	1256.15	1444.57	1661.25	1910.44	2197.01	2526.56	2905.54	3341.37
Fixed Access Wi-Fi Data Traffic (EB/year), worst, 35%CAGR	118	154	200	270	364.5	492.075	664.301	896.807	1210.69	1634.43	2206.48	2978.75	4021.31	5428.77	7328.84	9893.93	13356.8	18031.7	24342.8	32862.8	44364.7
Fixed total worst (EB/year)	325	390	470	580.5	721.575	902.711	1136.53	1439.87	1835.22	2352.64	3032.42	3928.58	5113.61	6684.92	8773.41	11555.2	15267.3	20228.7	26869.3	35768.3	47706.1	EB
	2010	2011	2012	2013	2014	2015	2016	2017	2018	2019	2020	2021	2022	2023	2024	2025	2026	2027	2028	2029	2030
Access (“Data-center-to-user”), best, (EB/year)	347.588	415.228	499.548	593.048	709.611	855.355	1036.06	1260.96	1556.17	1943.14	2458.74	3077.9	3857.03	4860.64	6161.19	7856.08	10254.7	13336.7	17346	22613.4	29589.6
Access (“Data-center-to-user”), expexted, (EB/year)	347.588	415.228	499.548	605.748	741.24	914.565	1150.55	1435.77	1814.97	2318.06	2993.23	3883.4	5057.08	6641.41	8796.44	11749.7	15937.8	21710.1	29739.5	41000.7	56909.8				1024
Access (“Data-center-to-user”), worst, (EB/year)	347.588	415.228	499.548	618.448	773.923	977.859	1244.08	1593.02	2066.32	2706.9	3581.28	4798.2	6489.42	8871.03	12256.4	17113.7	24108.3	34345	49449.4	71914.1	105581
Within and between Data centers, (EB/year)	1055.29	1427.97	2162.85	2568.65	3163.27	3887.98	4756.59	5830.01	7121.94	8674.34	10527.4	12747	15398.3	18518.7	22150.5	26315.1	30881.8	35878.1	41093.9	46124.5	50254.2		ZetaBytes	1.37	1.8	2.6	3.1	3.813	4.68999	5.76869	7.09549	8.72745	10.7348	13.2038	16.2406	19.976	24.5704	30.2216	37.1726	45.7223	56.2384	69.1733	85.0831	104.652
																								Global Data Center IP Traffic [138]
Global Data Center IP Traffic, best, (EB/year)	1402.88	1843.2	2662.4	3161.7	3872.88	4743.34	5792.65	7090.97	8678.11	10617.5	12986.2	15824.9	19255.3	23379.4	28311.7	34171.1	41136.5	49214.8	58439.9	68737.9	79843.7			2010	2011	2012	2013	2014	2015	2016	2017	2018	2019	2020	2021	2022	2023	2024	2025	2026	2027	2028	2029	2030
Global Data Center IP Traffic, exp, (EB/year)	1402.88	1843.2	2662.4	3174.4	3904.51	4802.55	5907.14	7265.78	8936.91	10992.4	13520.6	16630.4	20455.4	25160.1	30947	38064.8	46819.6	57588.2	70833.4	87125.1	107164		2011-2016	http://www.convergedigest.com/2012/10/cisco-global-data-center-traffic.html
Global Data Center IP Traffic, worst, (EB/year)	1402.88	1843.2	2662.4	3187.1	3937.2	4865.84	6000.67	7423.03	9188.25	11381.2	14108.7	17545.2	21887.7	27389.7	34406.9	43428.7	54990.2	70223.1	90543.3	118039	155835		2012-2017
	Source: Cisco Global Cloud Index: Forecast and Methodology, 2011–2016

## Sheet: WAN FAN Wi-Fi
											WIRELESS
			Year	2010	2011	2012	2013	2014	2015	2016	2017	2018	2019	2020	2021	2022	2023	2024	2025	2026	2027	2028	2029	2030
		Monthly 2G/3G mobile voice Traffic, EB		1.56235	1.56235	1.56235	1.56235	1.56235	1.56235	1.56235	1.56235	1.56235	1.56235	1.56235	1.56235	1.56235	1.56235	1.56235	1.56235	1.56235	1.56235	1.56235	1.56235	1.56235
		Monthly 2G Mobile Data Traffic, EB		0.1504	0.185274	0.225417	0.292541	0.373721	0.457942	0.52634	0.581535	0.670743	0.773634	0.883526	1.04698	1.04698	1.04698	1.04698	1.04698	1.04698	1.04698	1.04698	1.04698	1.04698	BASELINE	2G
		Best 2020-2030													0.924	0.924	0.924	0.924	0.924	0.924	0.924	0.924	0.924	0.924	Best
		Expected 2020-2030													0.99	0.99	0.99	0.99	0.99	0.99	0.99	0.99	0.99	0.99	Expected
		Worst- 2020-2030													1.056	1.056	1.056	1.056	1.056	1.056	1.056	1.056	1.056	1.056	Worst
Baseline CAGR 2018-2030	1.58	Monthly 3G Mobile Data Traffic, EB		0.16	0.324	0.576	0.976	1.316	1.645	2.072	2.24	2.83136	2.93577	3.09234	3.48993	3.48993	3.48993	3.48993	3.48993	3.48993	3.48993	3.48993	3.48993	3.48993	BASELINE	3G
Best CAGR 2020-2030	1.4	Best 2020-2030													3.08	3.08	3.08	3.08	3.08	3.08	3.08	3.08	3.08	3.08	Best
Expected CAGR 2020-2030	1.5	Expected 2020-2030													3.3	3.3	3.3	3.3	3.3	3.3	3.3	3.3	3.3	3.3	Expected
Worst CAGR 2020-2030	1.6	Worst- 2020-2030													3.52	3.52	3.52	3.52	3.52	3.52	3.52	3.52	3.52	3.52	Worst
Share voice 2010	0.83
2G data traffic constant from 2021		Monthly 4G Mobile Data Traffic, EB		0.0096	0.0324	0.099	0.336	1.12	2.585	4.81	8.4	14.1568	24.1851	39.7587	61.4227	88.2254	130.684	178.95	239.242	239.242	239.242	239.242	239.242	239.242	BASELINE	4G
		Best 2020-2030													54.208	68.992	90.552	109.87	130.153	130.153	130.153	130.153	130.153	130.153	Best
		Expected 2020-2030													58.08	79.2	111.375	144.787	183.769	183.769	183.769	183.769	183.769	183.769	Expected
		Worst 2020-2030													61.952	90.112	135.168	187.433	253.755	253.755	253.755	253.755	253.755	253.755	Worst
		Monthly 5G Mobile Data Traffic, EB		8.88178e-18	-0.001674	-0.0004167	-0.00454078	-0.00972085	0.0120585	-0.00834044	-0.0215351	0.0370975	0.065156	0.441763	3.83892	17.5194	39.0244	91.8206	191.207	443.498	842.119	1471.94	2467.06	4039.34	BASELINE	5G
		Best 2020-2030													3.388	13.7002	27.0403	56.3751	104.021	213.787	359.694	557.084	827.334	1200.28	Best
		Expec- 2020-2030													3.63	15.7272	33.2584	74.2917	146.871	323.415	583.01	967.446	1539.39	2392.85	Expected
		Worst- 2020-2030													3.872	17.8941	40.3634	96.1735	202.806	476.357	915.961	1621.27	2751.75	4562.5	Worst
		Monthly TOTAL Mobile Data Traffic, EB		0.32	0.54	0.9	1.6	2.8	4.7	7.4	11.2	17.696	27.9597	44.1763	69.7985	110.282	174.245	275.307	434.985	687.277	1085.9	1715.72	2710.83	4283.12	BASELINE	TOTAL MOBILE DATA TRAFFIC
														44	61.6	86.24	120.736	169.03	236.643	331.3	463.819	649.347	909.086	1272.72	Best
														44	66	99	148.5	222.75	334.125	501.188	751.781	1127.67	1691.51	2537.26	Expected
														44	70.4	112.64	180.224	288.358	461.373	738.198	1181.12	1889.79	3023.66	4837.85	Worst
		Shares of mobile data traffic		2010	2011	2012	2013	2014	2015	2016	2017	2018	2019	2020	2021	2022	2023	2024	2025	2026	2027	2028	2029	2030
		% 2G data		0.47	0.3431	0.250463	0.182838	0.133472	0.0974344	0.0711271	0.0519228	0.0379036	0.0276696	0.02	0.015	0.00949367	0.00600865	0.00380294	0.00240693	0.00152337	0.000964159	0.000610227	0.00038622	0.000244443	2G
		% 3G data		0.5	0.6	0.64	0.61	0.47	0.35	0.28	0.2	0.16	0.105	0.07	0.05	0.0316456	0.0200288	0.0126765	0.00802309	0.0050779	0.00321386	0.00203409	0.0012874	0.00081481	3G
		% LTE/4G data		0.03	0.06	0.11	0.21	0.4	0.55	0.65	0.75	0.8	0.865	0.9	0.88	0.8	0.75	0.65	0.55	0.348101	0.220317	0.139441	0.088254	0.055857	4G
		% 5G data		2.77556e-17	-0.0031	-0.000463	-0.00283799	-0.00347173	0.00256564	-0.00112709	-0.00192277	0.00209638	0.00233035	0.01	0.055	0.158861	0.223963	0.333521	0.43957	0.645297	0.775505	0.857914	0.910072	0.943084	5G
		Shares of total wireless traffic
				2010	2011	2012	2013	2014	2015	2016	2017	2018	2019	2020	2021	2022	2023	2024	2025	2026	2027	2028	2029	2030
		%Voice		0.83	0.743145	0.634496	0.494048	0.358145	0.249483	0.174324	0.122419	0.081126	0.0529216	0.0341583	0.0218937	0.013969	0.00888673	0.00564292	0.00357888	0.00226809	0.0014367	0.000909783	0.000576004	0.000364637	Voice
		% 2G data		0.0799	0.088127	0.0915452	0.0925073	0.0856696	0.0731261	0.0587279	0.0455664	0.0348287	0.0262053	0.0193168	0.0146716	0.00936105	0.00595526	0.00378148	0.00239831	0.00151992	0.000962774	0.000609672	0.000385997	0.000244354	2G
		% 3G data		0.085	0.154113	0.233923	0.308631	0.301672	0.262681	0.231189	0.175516	0.14702	0.0994432	0.0676089	0.0489053	0.0312035	0.0198509	0.0126049	0.00799438	0.00506639	0.00320925	0.00203224	0.00128666	0.000814513	3G
		% LTE/4G data		0.0051	0.0154113	0.0402054	0.10625	0.256742	0.412784	0.536689	0.658186	0.735099	0.819223	0.869258	0.860734	0.788825	0.743335	0.646332	0.548032	0.347312	0.220001	0.139314	0.0882032	0.0558366	4G
		% 5G data		4.71845e-18	-0.000796251	-0.000169228	-0.00143589	-0.00222835	0.00192555	-0.000930608	-0.00168739	0.00192631	0.00220703	0.00965842	0.0537958	0.156642	0.221972	0.331639	0.437997	0.643834	0.774391	0.857134	0.909548	0.94274	5G
					2010	2011	2012	2013	2014	2015	2016	2017	2018	2019	2020	2021	2022	2023	2024	2025	2026	2027	2028	2029	2030
EB/year		2G/3G mobile voice traffic	Annual		18.7482	18.7482	18.7482	18.7482	18.7482	18.7482	18.7482	18.7482	18.7482	18.7482	18.7482	18.7482	18.7482	18.7482	18.7482	18.7482	18.7482	18.7482	18.7482	18.7482	18.7482	Voice
EB/year		2G mobile data traffic	Annual		1.8048	2.22329	2.705	3.51049	4.48465	5.4953	6.31609	6.97842	8.04891	9.28361	10.6023	12.5637	12.5637	12.5637	12.5637	12.5637	12.5637	12.5637	12.5637	12.5637	12.5637	2G DT
		Best														11.088	11.088	11.088	11.088	11.088	11.088	11.088	11.088	11.088	11.088
		Expected														11.88	11.88	11.88	11.88	11.88	11.88	11.88	11.88	11.88	11.88
		Worst														12.672	12.672	12.672	12.672	12.672	12.672	12.672	12.672	12.672	12.672
		3G mobile data traffic	Annual		1.92	3.888	6.912	11.712	15.792	19.74	24.864	26.88	33.9763	35.2292	37.1081	41.8791	41.8791	41.8791	41.8791	41.8791	41.8791	41.8791	41.8791	41.8791	41.8791	3G DT
		Best														36.96	36.96	36.96	36.96	36.96	36.96	36.96	36.96	36.96	36.96
		Expected														39.6	39.6	39.6	39.6	39.6	39.6	39.6	39.6	39.6	39.6
		Worst														42.24	42.24	42.24	42.24	42.24	42.24	42.24	42.24	42.24	42.24
EB/year		4G mobile data traffic	Annual		0.1152	0.3888	1.188	4.032	13.44	31.02	57.72	100.8	169.882	290.221	477.104	737.073	1058.7	1568.21	2147.4	2870.9	2870.9	2870.9	2870.9	2870.9	2870.9	LTE/4G DT
		Best														650.496	827.904	1086.62	1318.44	1561.84	1561.84	1561.84	1561.84	1561.84	1561.84
		Expected														696.96	950.4	1336.5	1737.45	2205.23	2205.23	2205.23	2205.23	2205.23	2205.23
		Worst														743.424	1081.34	1622.02	2249.2	3045.06	3045.06	3045.06	3045.06	3045.06	3045.06
		5G mobile data traffic	Annual		1.06581e-16	-0.020088	-0.0050004	-0.0544894	-0.11665	0.144702	-0.100085	-0.258421	0.44517	0.781872	5.30116	46.067	210.233	468.292	1101.85	2294.48	5321.98	10105.4	17663.3	29604.7	48472.1	5G
		Best														40.656	164.402	324.484	676.501	1248.25	2565.44	4316.33	6685.01	9928.01	14403.4
		Expected														43.56	188.727	399.101	891.5	1762.46	3880.98	6996.12	11609.4	18472.7	28714.2
		Worst														46.464	214.729	484.361	1154.08	2433.67	5716.28	10991.5	19455.3	33021	54750
																										Baseline	15.6563	ZettaBytes
					22.5882	25.2282	29.5482	37.9482	52.3482	75.1482	107.548	153.148	231.1	354.264	548.864	757.948	1059.1	1477.9	2061.73	2876.89	4194.08	5944.97	8313.65	11556.6	16032	ExaBytes	16032	Best	15.6563	ZettaBytes
																810.748	1209.35	1805.83	2699.18	4037.91	6156.43	9271.57	13884.8	20748.2	30989.7	ExaBytes	30989.7	Expected	30.2633	ZettaBytes
																850.876	1357.06	2167.37	3464.27	5539.72	8822.34	14097.6	22561.3	36127	57856	ExaBytes	57867.9	Worst	56.5116	ZettaBytes
					2010	2011	2012	2013	2014	2015	2016	2017	2018	2019	2020	2021	2022	2023	2024	2025	2026	2027	2028	2029	2030
		Electricity efficiency overall WAN		TWh/EB	5.96305	4.99053	3.9258	2.52106	1.50459	0.857908	0.486134	0.26956	0.151318	0.0834192	0.0468611	0.0273991	0.0210321	0.016688	0.0129325	0.0100067	0.00686402	0.00490611	0.00361389	0.00273272	0.00211987	TWh/EB		Best
		Table 2		TWh/EB	9.01586	7.93777	6.65428	4.76973	3.18213	2.02162	1.2662	0.776195	0.478499	0.290478	0.178688	0.113758	0.0829777	0.062968	0.0471731	0.0355546	0.0234855	0.0160502	0.0113421	0.00830827	0.00632615	TWh/EB		Expected
				TWh/EB	15.1205	13.765	12.0767	9.59245	7.17926	5.18514	3.74014	2.68501	1.9375	1.40324	1.03818	0.795829	0.592663	0.465441	0.358702	0.277983	0.179577	0.119901	0.083689	0.0615506	0.0478193	TWh/EB		Worst
							ELECTRICITY WIRELESS
																											TWh/EB
Best Scenario		2G/3G Voice Electricity usage		TWh		93.7412	79.68	65.6188	45.9332	32.1532	22.5073	15.7551	11.0286	7.71999	5.40399	3.78279	2.64796	2.51556	2.38978	2.27029	2.15678	2.04894	1.94649	1.84917	1.75671	1.66887		2G/3G voice
		2G Electr.		TWh		36.096	37.7959	37.87	34.4028	30.7647	26.3884	21.2309	16.4201	13.2572	10.7036	8.55683	7.09789	6.743	6.40585	6.08555	5.78128	5.49221	5.2176	4.95672	4.70889	4.47344
		Best 2020-2030															6.26417	5.95096	5.65341	5.37074	5.10221	4.8471	4.60474	4.3745	4.15578	3.94799		2G
		3G Electr.		TWh		4.8	8.262	12.096	14.3472	13.5416	11.8489	10.4472	7.90601	6.99524	5.07723	3.74361	2.95745	2.80958	2.6691	2.53565	2.40886	2.28842	2.174	2.0653	1.96204	1.86393
		Best 2020-2030															2.61007	2.47957	2.35559	2.23781	2.12592	2.01962	1.91864	1.82271	1.73157	1.645		3G
		LTE Electr.		TWh		0.0576	0.16524	0.4158	0.98784	2.30496	3.72395	4.8505	5.92951	6.99524	8.36535	9.62643	10.4102	14.2052	19.9894	26.0036	33.0266	31.3752	29.8065	28.3162	26.9003	25.5553
		Best 2020-2030															9.18745	11.1085	13.8509	15.9654	17.9673	17.0689	16.2154	15.4047	14.6344	13.9027		4G
		5G Electr.		TWh		5.32907e-18	-0.00085374	-0.000175014	-0.00133499	-0.00200055	0.00173715	-0.000841067	-0.00152015	0.00183308	0.00225367	0.010696	0.065064	0.282082	0.596918	1.33427	2.63954	5.81623	10.4917	17.4216	27.7396	43.1474	Necessary EE (TWh/EB) 2015:
		Best 2020-2030															0.0574216	0.220587	0.41361	0.8192	1.43598	2.80369	4.48133	6.59353	9.30254	12.8212	0.000890149	5G
						2010	2011	2012	2013	2014	2015	2016	2017	2018	2019	2020	2021	2022	2023	2024	2025	2026	2027	2028	2029	2030
Best (Lowest data growth, best annual EE, lowest TWh/EB)					Wireless TOTAL	134.695	125.902	116	95.6697	78.7625	64.4703	52.2829	41.2826	34.9695	29.5525	25.7204	20.7671	22.2751	24.6633	26.6635	28.7881	28.7882	29.1666	30.0446	31.581	33.9857	0.00890149	EE (TWh/EB) 4G 2030 foreseen
	TWh/EB, voice	5			Fixed TOTAL	204.1	224.4	247.64	251.619	256.3	261.711	267.878	274.834	282.611	291.245	300.775	311.244	349.573	393.738	444.742	503.77	572.222	651.752	744.318	852.238	978.254	0.00238433	EE (TWh/EB) required 4G 2030
	TWh/EB, 2G data	20			TOTAL Networks	338.795	350.302	363.64	347.288	335.063	326.181	320.161	316.116	317.58	320.797	326.496	332.011	371.848	418.401	471.406	532.558	601.01	680.918	774.363	883.819	1012.24	3.73332	foreseen 4G improvement 2015-2030
	TWh/EB, 3G data	2.5																									50.3495	necessary 4G improvement
	TWh/EB, 4G data	0.5	TWhr/EB		0.7	0.49	0.343	0.2401	0.16807	0.117649	0.0823543	0.057648	0.0403536	0.0282475	0.0268351	0.0254934	0.0242187	0.0230078	0.0218574	0.0207645	0.0197263	0.01874	0.017803
	TWh/EB, 5G data	0.05		EE in year	2012	2013	2014	2015	2016	2017	2018	2019	2020	2021	2022	2023	2024	2025	2026	2027	2028	2029	2030
					0.95
Expected Scenario		2G/3G Voice Electricity usage		TWh		131.238	116.802	102.365	79.845	62.2791	48.5777	37.8906	29.5547	23.0526	17.9811	14.0252	10.9397	10.3927	9.87306	9.3794	8.91043	8.46491	8.04167	7.63958	7.2576	6.89472
		2G Electr.		TWh		66.7776	73.2129	78.0663	79.0239	78.7434	75.2612	67.4719	58.1469	52.312	47.0626	41.9231	38.7495	36.8121	34.9715	33.2229	31.5617	29.9837	28.4845	27.0603	25.7072	24.4219
		Expec- 2020-2030															36.6407	34.8087	33.0683	31.4149	29.8441	28.3519	26.9343	25.5876	24.3082	23.0928
		3G Electr.				5.568	10.0349	15.6349	20.6642	21.733	21.1896	20.8181	17.5548	17.3076	13.9977	11.5005	10.1238	9.61757	9.13669	8.67985	8.24586	7.83357	7.44189	7.0698	6.71631	6.38049
		Expec- 2020-2030															9.5728	9.09416	8.63946	8.20748	7.79711	7.40725	7.03689	6.68505	6.35079	6.03325
		LTE Electr		TWh		0.06912	0.207619	0.555984	1.47184	3.82679	6.88924	9.99886	13.6201	17.9044	23.8582	30.5926	36.8644	50.3032	70.786	92.0832	116.953	111.105	105.55	100.272	95.2587	90.4958
		Expec- 2020-2030															34.8582	45.1572	60.3272	74.5041	89.8348	85.3431	81.0759	77.0221	73.171	69.5125
		5G Electr.		TWh		6.39488e-18	-0.0010727	-0.000234019	-0.00198908	-0.0033214	0.00321369	-0.00173378	-0.00349177	0.00469179	0.00642752	0.0339917	0.230403	0.9989	2.11379	4.72487	9.34707	20.5963	37.153	61.6927	98.2305	152.792
		Expec- 2020-2030															0.217864	0.896714	1.80147	3.82287	7.17976	15.0195	25.7215	40.5481	61.2939	90.5121
						2010	2011	2012	2013	2014	2015	2016	2017	2018	2019	2020	2021	2022	2023	2024	2025	2026	2027	2028	2029	2030
Expected (Expected data growth, expected annual EE, expected TWh/EB)					Wireless TOTAL	203.652	200.256	196.622	181.003	166.579	151.921	136.178	118.873	110.581	102.906	98.0754	92.2293	100.35	113.709	127.329	143.566	144.587	148.81	157.482	172.382	196.045
	TWh/EB, voice	7			Fixed TOTAL	204.1	224.4	247.64	273.505	303.345	337.825	384.364	431.638	486.48	550.163	624.177	710.267	841.44	999.249	1189.4	1418.85	1696.11	2031.58	2437.95	2930.79	3529.13
	TWh/EB, 2G data	37			TOTAL Networks	407.752	424.656	444.262	454.508	469.924	489.746	520.541	550.511	597.061	653.069	722.253	802.496	941.789	1112.96	1316.73	1562.42	1840.7	2180.39	2595.43	3103.17	3725.18
	TWh/EB, 3G data	2.9
	TWh/EB, 4G data	0.6	TWhr/EB		0.78	0.6084	0.474552	0.370151	0.288717	0.2252	0.175656	0.137011	0.106869	0.0833578	0.0791899	0.0752304	0.0714689	0.0678954	0.0645006	0.0612756	0.0582118	0.0553012	0.0525362
	TWh/EB, 5G data	0.06		EE in year	2012	2013	2014	2015	2016	2017	2018	2019	2020	2021	2022	2023	2024	2025	2026	2027	2028	2029	2030
					0.95
Worst Scenario		2G/3G Voice Electricity usage		TWh		262.475	249.352	236.228	212.605	191.344	172.21	154.989	139.49	125.541	112.987	101.688	91.5195	86.9435	82.5963	78.4665	74.5432	70.816	67.2752	63.9115	60.7159	57.6801
	TWh/EB	2G Electr.		TWh		72.192	84.4849	97.38	113.74	130.772	144.219	149.183	148.345	153.991	159.852	164.302	175.228	166.467	158.143	150.236	142.724	135.588	128.809	122.368	116.25	110.437
		Worst- 2020-2030															176.738	167.901	159.506	151.531	143.954	136.757	129.919	123.423	117.252	111.389
		3G Electr.		TWh		6.72	12.9276	21.7728	33.2035	40.2933	45.3299	51.3868	49.998	56.8777	53.0775	50.3175	51.1082	48.5528	46.1252	43.8189	41.628	39.5466	37.5692	35.6908	33.9062	32.2109
		Worst- 2020-2030															51.5486	48.9712	46.5226	44.1965	41.9867	39.8873	37.893	35.9983	34.1984	32.4885
		LTE Electr.		TWh		0.157824	0.506023	1.4648	4.47431	13.4229	27.8825	46.6938	73.3899	111.318	171.155	253.231	352.092	480.445	676.077	879.486	1117.01	1061.16	1008.11	957.7	909.815	864.324
		Worst- 2020-2030															355.126	490.719	699.275	921.178	1184.78	1125.54	1069.26	1015.8	965.008	916.758
		5G Electr.		TWh		1.46017e-17	-0.00261445	-0.000616549	-0.00604669	-0.0116502	0.0130066	-0.00809661	-0.0188149	0.0291705	0.0461101	0.281367	2.20057	9.54049	20.1888	45.1272	89.2738	196.715	354.848	589.226	938.199	1459.32
		Worst- 2020-2030															2.21954	9.74451	20.8815	47.2664	94.6895	211.289	385.963	649.006	1046.46	1648.32
						2010	2011	2012	2013	2014	2015	2016	2017	2018	2019	2020	2021	2022	2023	2024	2025	2026	2027	2028	2029	2030
Worst (Highest data growth, worst annual EE, highest TWh/EB)					Wireless TOTAL	341.545	347.267	356.845	364.017	375.821	389.654	402.245	411.204	447.757	497.118	569.82	677.152	804.28	1008.78	1242.64	1539.95	1584.29	1690.31	1888.14	2223.64	2766.64
	TWh/EB, voice	14			Fixed TOTAL	204.1	224.4	247.64	296.179	356.449	431.58	525.572	643.532	791.994	979.313	1216.18	1516.28	1897.14	2381.2	2997.21	3782	4782.76	6059.98	7691.17	9775.71	12441
	TWh/EB, 2G data	40			TOTAL Networks	545.645	571.667	604.485	660.196	732.27	821.234	927.817	1054.74	1239.75	1476.43	1786	2193.43	2701.42	3389.98	4239.85	5321.95	6367.04	7750.29	9579.31	11999.3	15207.6
TWh/EB	TWh/EB, 3G data	3.5	LTE power ratio
	TWh/EB, 4G data	1.37	TWhr/EB		0.9	0.81	0.729	0.6561	0.59049	0.531441	0.478297	0.430467	0.38742	0.348678	0.331245	0.314682	0.298948	0.284001	0.269801	0.256311	0.243495	0.23132	0.219754
	TWh/EB, 5G data	0.137		EE in year	2012	2013	2014	2015	2016	2017	2018	2019	2020	2021	2022	2023	2024	2025	2026	2027	2028	2029	2030
					0.95
						2010	2011	2012	2013	2014	2015	2016	2017	2018	2019	2020	2021	2022	2023	2024	2025	2026	2027	2028	2029	2030
											ELECTRICITY FIXED ACCESS WIRED
						2010	2011	2012	2013	2014	2015	2016	2017	2018	2019	2020	2021	2022	2023	2024	2025	2026	2027	2028	2029	2030
Fixed	Best, Fixed 13%CAGR+WiFi 25%CAGR growths, 15%CAGR improvement of EE	Fixed access traffic EB				325	390	470	555.1	657.263	780.207	928.509	1107.81	1325.07	1588.88	1909.87	2301.21	2779.18	3363.99	4080.7	4960.44	6041.86	7372.99	9013.61	11038	13538.8	Necessary EE (TWh/EB) in 2030 in order to use as little as in 2015:
		Fixed access electricity usage, TWh				162	178	196.24	197.006	198.274	200.058	202.373	205.234	208.661	212.673	217.293	222.544	255.329	293.604	338.35	390.728	452.115	524.138	608.729	708.174	825.186	0.0147767
					EE, TWh/EB, Table 2	0.498462	0.45641	0.417532	0.354902	0.301667	0.256417	0.217954	0.185261	0.157472	0.133851	0.113773	0.0967075	0.0918721	0.0872785	0.0829146	0.0787688	0.0748304	0.0710889	0.0675344	0.0641577	0.0609498	4.20701
	Expected, Fixed 14%CAGR+WiFi 30%CAGR growths, 10%CAGR improvement of EE	Fixed access traffic EB		( Annual % Efficiency Improvem't s 15%,10%, 5%)		325	390	470	567.8	688.892	839.417	1043	1282.62	1583.87	1963.79	2444.36	3053.9	3828.98	4816.83	6078.51	7693.02	9762.63	12419.8	15836	20233.7	25901.3	17.3528
		Fixed access electricity usage, TWh		0.15		162	178	196.24	213.367	232.984	255.502	285.722	316.228	351.45	392.178	439.335	494.001	588.409	703.203	843.024	1013.59	1221.96	1476.82	1788.89	2171.38	2640.63
				0.1	EE, TWh/EB, Table 2	0.498462	0.45641	0.417532	0.375779	0.338201	0.304381	0.273943	0.246548	0.221894	0.199704	0.179734	0.16176	0.153672	0.145989	0.138689	0.131755	0.125167	0.118909	0.112963	0.107315	0.101949
				0.05
	Worst, Fixed 15%CAGR+WiFi 35%CAGR growths, 5%CAGR improvement of EE	Fixed access traffic EB				325	390	470	580.5	721.575	902.711	1136.53	1439.87	1835.22	2352.64	3032.42	3928.58	5113.61	6684.92	8773.41	11555.2	15267.3	20228.7	26869.3	35768.3	47706.1
		Fixed access electricity usage, TWh				162	178	196.24	230.258	271.906	323.154	386.515	465.192	563.272	685.977	839.977	1033.8	1278.36	1587.62	1979.43	2476.7	3108.72	3913.02	4937.7	6244.38	7912.04
					EE, TWh/EB, Table 2	0.498462	0.45641	0.417532	0.396655	0.376823	0.357981	0.340082	0.323078	0.306924	0.291578	0.276999	0.263149	0.249992	0.237492	0.225618	0.214337	0.20362	0.193439	0.183767	0.174579	0.16585
											ELECTRICITY FIXED ACCESS Wi-Fi
		Wi-Fi traffic EB				118	154	200	250	312.5	390.625	488.281	610.352	762.939	953.674	1192.09	1490.12	1862.65	2328.31	2910.38	3637.98	4547.47	5684.34	7105.43	8881.78	11102.2	Necessary EE (TWh/EB) in 2030 in order to use as little as in 2015:
		Wi-Fi electricity usage, TWh				42.1	46.4	51.4	54.6125	58.0258	61.6524	65.5057	69.5998	73.9498	78.5716	83.4823	88.7	94.2437	100.134	106.392	113.042	120.107	127.614	135.59	144.064	153.068	0.00555315
					EE, TWh/EB, Table 2	0.35678	0.301299	0.257	0.21845	0.185683	0.15783	0.134156	0.114032	0.0969274	0.0823883	0.0700301	0.0595256	0.0505967	0.0430072	0.0365561	0.0310727	0.0264118	0.02245	0.0190825	0.0162201	0.0137871	11.4476
		Wi-Fi traffic EB		( Annual % Efficiency Improvem't s 15%,10%, 5%)		118	154	200	260	338	439.4	585	760.5	988.65	1285.25	1670.82	2172.06	2823.68	3670.79	4772.02	6203.63	8064.72	10484.1	13629.4	17718.2	23033.7	28.4217
		Wi-Fi electricity usage, TWh		0.15		42.1	46.4	51.4	60.138	70.3615	82.3229	98.6414	115.41	135.03	157.985	184.843	216.266	253.031	296.047	346.375	405.258	474.152	554.758	649.067	759.408	888.507
				0.1	EE, TWh/EB, Table 2	0.35678	0.301299	0.257	0.2313	0.20817	0.187353	0.168618	0.151756	0.13658	0.122922	0.11063	0.0995671	0.0896104	0.0806493	0.0725844	0.065326	0.0587934	0.052914	0.0476226	0.0428604	0.0385743
				0.05
		Wi-Fi traffic EB				118	154	200	270	364.5	492.075	664.301	896.807	1210.69	1634.43	2206.48	2978.75	4021.31	5428.77	7328.84	9893.93	13356.8	18031.7	24342.8	32862.8	44364.7
		Wi-Fi electricity usage, TWh				42.1	46.4	51.4	65.9205	84.543	108.426	139.057	178.341	228.722	293.336	376.203	482.48	618.781	793.586	1017.77	1305.3	1674.04	2146.96	2753.47	3531.33	4528.93
					EE, TWh/EB, Table 2	0.35678	0.301299	0.257	0.24415	0.231942	0.220345	0.209328	0.198862	0.188919	0.179473	0.170499	0.161974	0.153875	0.146182	0.138873	0.131929	0.125332	0.119066	0.113113	0.107457	0.102084
				( Annual % Efficiency Improvem't s 15%,10%, 5%)
				0.15		42.1	46.4	51.4	54.6125	58.0258	61.6524	65.5057	69.5998	73.9498	78.5716	83.4823	88.7	94.2437	100.134	106.392	113.042	120.107	127.614	135.59	144.064	153.068
				0.1		42.1	46.4	51.4	60.138	70.3615	82.3229	96.3178	112.692	131.849	154.264	180.489	211.172	247.071	289.073	338.215	395.712	462.983	541.69	633.778	741.52	867.578
				0.05		42.1	46.4	51.4	65.9205	84.543	108.426	139.057	178.341	228.722	293.336	376.203	482.48	618.781	793.586	1017.77	1305.3	1674.04	2146.96	2753.47	3531.33	4528.93
				2010	2011	2012	2013	2014	2015	2016	2017	2018	2019	2020	2021	2022	2023	2024	2025	2026	2027	2028	2029	2030
		2G/3G voice		93.7412	79.68	65.6188	45.9332	32.1532	22.5073	15.7551	11.0286	7.71999	5.40399	3.78279	2.64796	2.51556	2.38978	2.27029	2.15678	2.04894	1.94649	1.84917	1.75671	1.66887
		2G data		36.096	37.7959	37.87	34.4028	30.7647	26.3884	21.2309	16.4201	13.2572	10.7036	8.55683	6.26417	5.95096	5.65341	5.37074	5.10221	4.8471	4.60474	4.3745	4.15578	3.94799
		3G data		4.8	8.262	12.096	14.3472	13.5416	11.8489	10.4472	7.90601	6.99524	5.07723	3.74361	2.61007	2.47957	2.35559	2.23781	2.12592	2.01962	1.91864	1.82271	1.73157	1.645
		4G data		0.0576	0.16524	0.4158	0.98784	2.30496	3.72395	4.8505	5.92951	6.99524	8.36535	9.62643	9.18745	11.1085	13.8509	15.9654	17.9673	17.0689	16.2154	15.4047	14.6344	13.9027
		5G data		5.32907e-18	-0.00085374	-0.000175014	-0.00133499	-0.00200055	0.00173715	-0.000841067	-0.00152015	0.00183308	0.00225367	0.010696	0.0574216	0.220587	0.41361	0.8192	1.43598	2.80369	4.48133	6.59353	9.30254	12.8212
				2010	2011	2012	2013	2014	2015	2016	2017	2018	2019	2020	2021	2022	2023	2024	2025	2026	2027	2028	2029	2030
		2G/3G voice		131.238	116.802	102.365	79.845	62.2791	48.5777	37.8906	29.5547	23.0526	17.9811	14.0252	10.9397	10.3927	9.87306	9.3794	8.91043	8.46491	8.04167	7.63958	7.2576	6.89472
		2G data		66.7776	73.2129	78.0663	79.0239	78.7434	75.2612	67.4719	58.1469	52.312	47.0626	41.9231	36.6407	34.8087	33.0683	31.4149	29.8441	28.3519	26.9343	25.5876	24.3082	23.0928
		3G data		5.568	10.0349	15.6349	20.6642	21.733	21.1896	20.8181	17.5548	17.3076	13.9977	11.5005	9.5728	9.09416	8.63946	8.20748	7.79711	7.40725	7.03689	6.68505	6.35079	6.03325
		4G data		0.06912	0.207619	0.555984	1.47184	3.82679	6.88924	9.99886	13.6201	17.9044	23.8582	30.5926	34.8582	45.1572	60.3272	74.5041	89.8348	85.3431	81.0759	77.0221	73.171	69.5125
		5G data		6.39488e-18	-0.0010727	-0.000234019	-0.00198908	-0.0033214	0.00321369	-0.00173378	-0.00349177	0.00469179	0.00642752	0.0339917	0.217864	0.896714	1.80147	3.82287	7.17976	15.0195	25.7215	40.5481	61.2939	90.5121
				2010	2011	2012	2013	2014	2015	2016	2017	2018	2019	2020	2021	2022	2023	2024	2025	2026	2027	2028	2029	2030
		2G/3G voice		262.475	249.352	236.228	212.605	191.344	172.21	154.989	139.49	125.541	112.987	101.688	91.5195	86.9435	82.5963	78.4665	74.5432	70.816	67.2752	63.9115	60.7159	57.6801
		2G data		72.192	84.4849	97.38	113.74	130.772	144.219	149.183	148.345	153.991	159.852	164.302	176.738	167.901	159.506	151.531	143.954	136.757	129.919	123.423	117.252	111.389
		3G data		6.72	12.9276	21.7728	33.2035	40.2933	45.3299	51.3868	49.998	56.8777	53.0775	50.3175	51.5486	48.9712	46.5226	44.1965	41.9867	39.8873	37.893	35.9983	34.1984	32.4885
		4G data		0.157824	0.506023	1.4648	4.47431	13.4229	27.8825	46.6938	73.3899	111.318	171.155	253.231	355.126	490.719	699.275	921.178	1184.78	1125.54	1069.26	1015.8	965.008	916.758
		5G data		1.46017e-17	-0.00261445	-0.000616549	-0.00604669	-0.0116502	0.0130066	-0.00809661	-0.0188149	0.0291705	0.0461101	0.281367	2.21954	9.74451	20.8815	47.2664	94.6895	211.289	385.963	649.006	1046.46	1648.32
		k		10
		M		20
		G		30
		T		40
		P		50
		E		60
		1 bit		1.0842e-19	ExaByte
		1 joule		2.77778e-16	TWh
		1 ExaByte		0.000390313	EB/TWH
		1 TWh		2562.05	TWH/EB
		1 KWh		1e-09	TWh							Figure 3b
		TB		9.53674e-07	EB
									Figure 3a																		Figure 3c
				2010	2011	2012	2013	2014	2015	2016	2017	2018	2019	2020	2021	2022	2023	2024	2025	2026	2027	2028	2029	2030
			Fixed access wired Best	162	178	196.24	197.006	198.274	200.058	202.373	205.234	208.661	212.673	217.293	222.544	255.329	293.604	338.35	390.728	452.115	524.138	608.729	708.174	825.186
			Fixed access wired Expected	162	178	196.24	213.367	232.984	255.502	285.722	316.228	351.45	392.178	439.335	494.001	588.409	703.203	843.024	1013.59	1221.96	1476.82	1788.89	2171.38	2640.63
			Fixed access wired Worst	162	178	196.24	230.258	271.906	323.154	386.515	465.192	563.272	685.977	839.977	1033.8	1278.36	1587.62	1979.43	2476.7	3108.72	3913.02	4937.7	6244.38	7912.04
											Figure 2a
				2010	2011	2012	2013	2014	2015	2016	2017	2018	2019	2020	2021	2022	2023	2024	2025	2026	2027	2028	2029	2030
			Fixed access WiFi Best	42.1	46.4	51.4	54.6125	58.0258	61.6524	65.5057	69.5998	73.9498	78.5716	83.4823	88.7	94.2437	100.134	106.392	113.042	120.107	127.614	135.59	144.064	153.068
			Fixed access WiFi Expected	42.1	46.4	51.4	60.138	70.3615	82.3229	98.6414	115.41	135.03	157.985	184.843	216.266	253.031	296.047	346.375	405.258	474.152	554.758	649.067	759.408	888.507
			Fixed access WiFi Worst	42.1	46.4	51.4	65.9205	84.543	108.426	139.057	178.341	228.722	293.336	376.203	482.48	618.781	793.586	1017.77	1305.3	1674.04	2146.96	2753.47	3531.33	4528.93
													Figure 2b

## Sheet: DataCenters
					2010	2011	2012	2013	2014	2015	2016	2017	2018	2019	2020	2021	2022	2023	2024	2025	2026	2027	2028	2029	2030
					EB/YEAR
		TOTAL Data Center traffic		Global Data Center IP Traffic, best, (EB/year)	1402.88	1843.2	2662.4	3161.7	3872.88	4743.34	5792.65	7090.97	8678.11	10617.5	12986.2	15824.9	19255.3	23379.4	28311.7	34171.1	41136.5	49214.8	58439.9	68737.9	79843.7	EB/year [Global Data Center IP Traffic]
		EB/yr		Global Data Center IP Traffic, exp, (EB/year)	1402.88	1843.2	2662.4	3174.4	3904.51	4802.55	5907.14	7265.78	8936.91	10992.4	13520.6	16630.4	20455.4	25160.1	30947	38064.8	46819.6	57588.2	70833.4	87125.1	107164
				Global Data Center IP Traffic, worst, (EB/year)	1402.88	1843.2	2662.4	3187.1	3937.2	4865.84	6000.67	7423.03	9188.25	11381.2	14108.7	17545.2	21887.7	27389.7	34406.9	43428.7	54990.2	70223.1	90543.3	118039	155835
				Annual EE improvement from 2013																							Necessary EE (TWh/EB) 2015:
		TWhr/EB	0.135	0.15	189.389	211.507	259.684	262.127	272.925	284.127	294.934	306.882	319.235	331.99	345.147	357.506	413.253	476.674	548.376	628.776	719.097	817.296	921.97	1030.21	1136.83	TWh	0.00355854
( Annual % Efficiency Improvements 15%,10%, 5%)	Electricity usages for Data Centers; 0.135 TWh/EB to 0.142 TWh/EB.	TWhr/EB	0.14	0.1	196.403	232.243	301.916	323.979	358.645	397.02	439.501	486.528	538.586	596.215	660.01	730.631	853.742	997.598	1165.69	1362.11	1591.63	1859.82	2173.2	2539.38	2967.27
		TWhr/EB	0.142	0.05	199.209	248.648	341.2	388.021	455.376	534.644	626.368	736.097	865.586	1018.57	1199.53	1417.12	1679.47	1996.56	2382.68	2857.06	3436.77	4169.36	5107.05	6325	7932.78
				%
		Electricity efficiency			0.135	0.11475	0.0975375	0.0829069	0.0704708	0.0599002	0.0509152	0.0432779	0.0367862	0.0312683	0.026578	0.0225913	0.0214618	0.0203887	0.0193692	0.0184008	0.0174807	0.0166067	0.0157764	0.0149876	0.0142382		4.20701
		Table 2			0.14	0.126	0.1134	0.10206	0.091854	0.0826686	0.0744017	0.0669616	0.0602654	0.0542389	0.048815	0.0439335	0.0417368	0.03965	0.0376675	0.0357841	0.0339949	0.0322951	0.0306804	0.0291464	0.0276891		16.8328
					0.142	0.1349	0.128155	0.121747	0.11566	0.109877	0.104383	0.0991639	0.0942057	0.0894954	0.0850206	0.0807696	0.0767311	0.0728946	0.0692498	0.0657874	0.062498	0.0593731	0.0564044	0.0535842	0.050905
			2010	2011	2012	2013	2014	2015	2016	2017	2018	2019	2020	2021	2022	2023	2024	2025	2026	2027	2028	2029	2030
		Data Centers Best	189.389	211.507	259.684	262.127	272.925	284.127	294.934	306.882	319.235	331.99	345.147	357.506	413.253	476.674	548.376	628.776	719.097	817.296	921.97	1030.21	1136.83
		Data Centers Expected	196.403	232.243	301.916	323.979	358.645	397.02	439.501	486.528	538.586	596.215	660.01	730.631	853.742	997.598	1165.69	1362.11	1591.63	1859.82	2173.2	2539.38	2967.27
		Data Centers Worst	199.209	248.648	341.2	388.021	455.376	534.644	626.368	736.097	865.586	1018.57	1199.53	1417.12	1679.47	1996.56	2382.68	2857.06	3436.77	4169.36	5107.05	6325	7932.78
		Figure 4
							Figure 4

## Sheet: Cons Dev Best 
	Numbers	Devices in use at the same time (millions), short lifetime and low average power consumption
			2010	2011	2012	2013	2014	2015	2016	2017	2018	2019	2020	2021	2022	2023	2024	2025	2026	2027	2028	2029	2030	KWhr/year (2010)			2011	2012	2013	2014	2015	2016	2017	2018	2019	2020	2021	2022	2023	2024	2025	2026	2027	2028	2029	2030
Desktops 3			438	440	445	446.98	444	435.12	426.418	417.89	409.532	401.341	393.314	385.448	377.739	370.184	362.781	355.525	348.415	341.446	334.617	327.925	321.366	220	# per Desktop	Best	0.95	0.9025	0.857375	0.814506	0.773781	0.735092	0.698337	0.66342	0.630249	0.598737	0.5688	0.54036	0.513342	0.487675	0.463291	0.440127	0.41812	0.397214	0.377354	0.358486
Monitors 3			486	489	496	499.62	496.928	486.989	477.249	467.704	458.35	449.183	440.2	431.396	422.768	414.312	406.026	397.906	389.947	382.148	374.505	367.015	359.675	97	1.05	Expected	0.97	0.9409	0.912673	0.885293	0.858734	0.832972	0.807983	0.783743	0.760231	0.737424	0.715301	0.693842	0.673027	0.652836	0.633251	0.614254	0.595826	0.577951	0.560613	0.543794
Laptops 3			603	617	662	745	862	1000	1159	1338.07	1543.65	1780.83	2054.45	2123.99	1997.49	1677.89	1409.43	1183.92	994.491	835.373	701.713	589.439	495.129	80		Worst	0.99	0.9801	0.970299	0.960596	0.95099	0.94148	0.932065	0.922745	0.913517	0.904382	0.895338	0.886385	0.877521	0.868746	0.860058	0.851458	0.842943	0.834514	0.826169	0.817907
Smartphones 1			350	460	700	900	1175	1390	1459.5	1532.48	1609.1	1689.55	1774.03	1774	1774	1774	1774	1774	1774	1774	1774	1774	1774	5
Tablets 1			50	100	150	207	256	321	369.15	424.522	488.201	561.431	561	561	561	561	561	561	561	561	561	561	561	15
Ord mobile phones 1			1250	1260	1050	906	593	764	725.8	689.51	655.034	622.283	591.169	561.61	533.53	506.853	481.511	457.435	434.563	412.835	392.193	372.584	353.954	1
Phablets 1			0	0	10	50	100	143.333	188.333	233.333	278.333	323.333	368.333	427.267	495.629	574.93	666.919	773.626	897.406	1040.99	1207.55	1400.76	1624.88	10
TV 8			2000	2003.75	2011.31	2022.73	2038.07	2057.39	2080.75	2108.21	2139.83	2171.93	2204.51	2237.58	2271.14	2305.21	2339.79	2374.88	2410.51	2446.66	2483.36	2520.61	2558.42	200	# per TV set
TV SetTopBox 8			760	761.425	764.296	768.636	774.465	781.807	790.684	801.12	813.137	825.334	837.714	850.279	863.033	875.979	889.119	902.455	915.992	929.732	943.678	957.833	972.201	100	0.38
TV GameConsole 8			400	400.75	402.261	404.545	407.613	411.478	416.15	421.642	427.967	434.386	440.902	447.515	454.228	461.042	467.957	474.977	482.101	489.333	496.673	504.123	511.685	102	0.2
A/V Receivers 8			600	601.125	603.392	606.818	611.42	617.216	624.225	632.463	641.95	651.579	661.353	671.273	681.342	691.562	701.936	712.465	723.152	733.999	745.009	756.184	767.527	65	0.3
DVD/Bluerays 8			700	701.312	703.957	707.954	713.323	720.086	728.262	737.873	748.942	760.176	771.578	783.152	794.899	806.823	818.925	831.209	843.677	856.332	869.177	882.215	895.448	28	0.35
	TWhr/year
Desktops			96.36	91.96	88.3547	84.3105	79.561	74.0713	68.9604	64.2021	59.7722	55.6479	51.8082	48.2334	44.9053	41.8069	38.9222	36.2366	33.7362	31.4084	29.2413	27.2236	25.3452
Monitors			47.142	45.0613	43.4211	41.5511	39.2608	36.5518	34.0297	31.6817	29.4957	27.4605	25.5657	23.8016	22.1593	20.6303	19.2068	17.8816	16.6477	15.4991	14.4296	13.434	12.507
Laptops			48.24	46.892	47.7964	51.0995	56.1684	61.9025	68.1577	74.7537	81.9273	89.7893	98.4058	96.6501	86.349	68.9065	54.9874	43.8799	35.0162	27.9429	22.2984	17.7942	14.1997
Smartphones			1.75	2.185	3.15875	3.85819	4.78522	5.37778	5.36433	5.35092	5.33754	5.3242	5.31089	5.04526	4.79299	4.55334	4.32568	4.10939	3.90392	3.70873	3.52329	3.34713	3.17977
Tablets			0.75	1.425	2.03063	2.66215	3.1277	3.72576	4.07039	4.4469	4.85824	5.30762	5.03837	4.78645	4.54713	4.31977	4.10378	3.8986	3.70367	3.51848	3.34256	3.17543	3.01666
Ord ph			1.25	1.197	0.947625	0.776782	0.483002	0.591169	0.53353	0.481511	0.434563	0.392193	0.353954	0.319444	0.288298	0.260189	0.234821	0.211926	0.191263	0.172615	0.155785	0.140596	0.126888
Phablets			0	0	0.09025	0.428687	0.814506	1.10909	1.38442	1.62945	1.84652	2.03781	2.20535	2.43029	2.67818	2.95136	3.2524	3.58414	3.94972	4.35259	4.79656	5.28581	5.82496
			195.492	188.72	185.799	184.687	184.201	183.329	182.501	182.546	183.672	185.96	188.688	181.267	165.72	143.428	125.033	109.802	97.1487	86.6028	77.7875	70.4007	64.2002
TV			400	380.712	363.041	346.847	332.004	318.393	305.908	294.448	283.922	273.772	263.984	254.547	245.447	236.672	228.211	220.052	212.186	204.6	197.286	190.233	183.432
TV STB			76	72.3354	68.9777	65.9009	63.0807	60.4948	58.1226	55.9452	53.9451	52.0166	50.157	48.3639	46.6349	44.9677	43.3601	41.81	40.3153	38.874	37.4842	36.1442	34.852
TV GC			40.8	38.8327	37.0302	35.3784	33.8644	32.4761	31.2026	30.0337	28.96	27.9247	26.9264	25.9638	25.0356	24.1405	23.2775	22.4454	21.6429	20.8692	20.1231	19.4037	18.71
A/V Receiver			39	37.1195	35.3965	33.8176	32.3704	31.0434	29.8261	28.7087	27.6824	26.6927	25.7385	24.8183	23.9311	23.0755	22.2506	21.4551	20.6881	19.9485	19.2353	18.5477	17.8846
DVD/Blueray			19.6	18.6549	17.789	16.9955	16.2682	15.6013	14.9895	14.428	13.9122	13.4148	12.9352	12.4728	12.0269	11.5969	11.1823	10.7826	10.3971	10.0254	9.66699	9.32139	8.98816
			575.4	547.655	522.234	498.939	477.587	458.009	440.049	423.564	408.421	393.82	379.741	366.166	353.075	340.453	328.282	316.545	305.229	294.317	283.795	273.65	263.867
Total (TWh)			770.892	736.375	708.034	683.626	661.788	641.338	622.55	606.11	592.093	579.78	568.43	547.432	518.795	483.881	453.315	426.348	402.378	380.92	361.583	344.05	328.067
			2010	2011	2012	2013	2014	2015	2016	2017	2018	2019	2020	2021	2022	2023	2024	2025	2026	2027	2028	2029	2030
Share TV&peripherals			0.746408	0.743717	0.737584	0.729842	0.721662	0.714146	0.70685	0.698823	0.689792	0.679258	0.668053	0.668878	0.680567	0.703588	0.72418	0.742459	0.758563	0.772648	0.784869	0.795377	0.804307
						2010	2011	2012	2013	2014	2015	2016	2017	2018	2019	2020	2021	2022	2023	2024	2025	2026	2027	2028	2029	2030
					Consumer devices Use Best	770.892	736.375	708.034	683.626	661.788	641.338	622.55	606.11	592.093	579.78	568.43	547.432	518.795	483.881	453.315	426.348	402.378	380.92	361.583	344.05	328.067
					Consumer devices Use Expected	1046.32	1019.04	998.542	981.969	969.433	960.969	954.042	947.583	944.421	944.415	946.957	937.152	917.51	889.523	854.101	811.886	775.387	743.653	715.912	691.54	670.03
					Consumer devices Use Worst	1177.9	1170.32	1169.01	1172.33	1179.78	1191.55	1206.99	1226.73	1249.48	1275.75	1306.72	1323.58	1327.75	1321.25	1305.11	1279.72	1245.22	1201.52	1164.74	1133.73	1107.57
					Figure 1

## Sheet: Cons Dev Expe
	Numbers	Devices in use at the same time (millions), expected lifetime and average expected power consumption
			2010	2011	2012	2013	2014	2015	2016	2017	2018	2019	2020	2021	2022	2023	2024	2025	2026	2027	2028	2029	2030	KWhr/year (2010)			2011	2012	2013	2014	2015	2016	2017	2018	2019	2020	2021	2022	2023	2024	2025	2026	2027	2028	2029	2030
Desktops 5			730	732	737	738.98	738	734.12	725.398	710.89	696.672	682.739	669.084	655.702	642.588	629.737	617.142	604.799	592.703	580.849	569.232	557.847	546.69	220	# per Desktop	Best	0.95	0.9025	0.857375	0.814506	0.773781	0.735092	0.698337	0.66342	0.630249	0.598737	0.5688	0.54036	0.513342	0.487675	0.463291	0.440127	0.41812	0.397214	0.377354	0.358486
Monitors 5			810	813	820	823.62	823.928	820.989	811.869	795.632	779.719	764.125	748.842	733.866	719.188	704.804	690.708	676.894	663.356	650.089	637.087	624.346	611.859	97	1.05	Expected	0.97	0.9409	0.912673	0.885293	0.858734	0.832972	0.807983	0.783743	0.760231	0.737424	0.715301	0.693842	0.673027	0.652836	0.633251	0.614254	0.595826	0.577951	0.560613	0.543794
Laptops 5			1005	1019	1064	1147	1278	1461	1689	1954.07	2259.65	2607.83	3008.51	3224.64	3267.25	3142.75	2853.24	2396.72	2013.25	1691.13	1420.55	1193.26	1002.34	80		Worst	0.99	0.9801	0.970299	0.960596	0.95099	0.94148	0.932065	0.922745	0.913517	0.904382	0.895338	0.886385	0.877521	0.868746	0.860058	0.851458	0.842943	0.834514	0.826169	0.817907
Smartphones 2			700	810	1160	1600	2075	2565	2849.5	2991.98	3141.57	3298.65	3463.59	3548.03	3548	3548	3548	3548	3548	3548	3548	3548	3548	5
Tablets 2			100	150	250	357	463	577	690.15	793.672	912.723	1049.63	1122.43	1122	1122	1122	1122	1122	1122	1122	1122	1122	1122	15
Ord mobile phones 2			2500	2510	2310	1956	1499	1357	1489.8	1415.31	1344.54	1277.32	1213.45	1152.78	1095.14	1040.38	988.364	938.946	891.998	847.398	805.028	764.777	726.538	1
Phablets 2			0	0	10	60	150	243.333	331.667	421.667	511.667	601.667	691.667	795.6	922.896	1070.56	1241.85	1440.54	1671.03	1938.4	2248.54	2608.31	3025.64	10
TV 10			2500	2503.75	2511.31	2522.73	2538.07	2557.39	2580.75	2608.21	2639.83	2675.68	2715.82	2756.55	2797.9	2839.87	2882.47	2925.7	2969.59	3014.13	3059.35	3105.24	3151.81	200	# per TV set
TV STB 10			950	951.425	954.296	958.636	964.465	971.807	980.684	991.12	1003.14	1016.76	1032.01	1047.49	1063.2	1079.15	1095.34	1111.77	1128.44	1145.37	1162.55	1179.99	1197.69	100	0.38
TV GC 10			500	500.75	502.261	504.545	507.613	511.478	516.15	521.642	527.967	535.136	543.163	551.311	559.58	567.974	576.494	585.141	593.918	602.827	611.869	621.047	630.363	102	0.2
A/V Receiver 10			750	751.125	753.392	756.818	761.42	767.216	774.225	782.463	791.95	802.704	814.745	826.966	839.37	851.961	864.74	877.711	890.877	904.24	917.804	931.571	945.544	65	0.3
DVD/Blueray 10			875	876.312	878.957	882.954	888.323	895.086	903.262	912.873	923.942	936.488	950.535	964.794	979.265	993.954	1008.86	1024	1039.36	1054.95	1070.77	1086.83	1103.14	28	0.35
	TWhr/year
Desktops			160.6	156.209	152.558	148.378	143.736	138.691	132.932	126.365	120.123	114.189	108.548	103.185	98.0881	93.2425	88.6364	84.2577	80.0954	76.1387	72.3774	68.802	65.4032
Monitors			78.57	76.4952	74.8392	72.9145	70.7535	68.3861	65.5976	62.3571	59.2767	56.3484	53.5648	50.9187	48.4033	46.0122	43.7392	41.5785	39.5245	37.572	35.7159	33.9516	32.2744
Laptops			80.4	79.0744	80.0894	83.7469	90.5123	100.369	112.551	126.308	141.679	158.604	177.484	184.527	181.357	169.212	149.016	121.418	98.9316	80.6094	65.6806	53.5165	43.6053
Smartphones			3.5	3.9285	5.45722	7.30138	9.18491	11.0133	11.8678	12.0873	12.3109	12.5387	12.7707	12.6896	12.3088	11.9395	11.5813	11.2339	10.8969	10.57	10.2529	9.94527	9.64691
Tablets			1.5	2.1825	3.52838	4.88736	6.14836	7.43234	8.62313	9.61911	10.7301	11.9694	12.4156	12.0385	11.6774	11.327	10.9872	10.6576	10.3379	10.0278	9.72692	9.43511	9.15206
Ord ph			2.5	2.4347	2.17348	1.78519	1.32705	1.1653	1.24096	1.14355	1.05378	0.971056	0.894828	0.824584	0.759854	0.700206	0.64524	0.594588	0.547913	0.504902	0.465267	0.428744	0.395087
Phablets			0	0	0.09409	0.547604	1.32794	2.08959	2.76269	3.40699	4.01015	4.57406	5.10052	5.69094	6.40344	7.20515	8.10724	9.12227	10.2644	11.5495	12.9955	14.6225	16.4532
			327.07	320.324	318.739	319.561	322.99	329.147	335.575	341.287	349.183	359.195	370.778	369.875	358.997	339.639	312.713	278.863	250.598	226.972	207.214	190.702	176.93
TV			500	485.727	472.578	460.485	449.386	439.223	429.938	421.478	413.79	406.827	400.542	394.353	388.26	382.262	376.356	370.541	364.816	359.18	353.631	348.167	342.788
TV STB			95	92.2882	89.7897	87.4921	85.3834	83.4524	81.6883	80.0808	78.6202	77.2971	76.1029	74.9271	73.7695	72.6298	71.5076	70.4028	69.3151	68.2442	67.1898	66.1517	65.1297
TV GC			51	49.5442	48.2029	46.9694	45.8374	44.8008	43.8537	42.9907	42.2066	41.4964	40.8552	40.224	39.6026	38.9907	38.3883	37.7952	37.2113	36.6364	36.0703	35.513	34.9644
A/V Receiver			48.75	47.3584	46.0763	44.8973	43.8152	42.8243	41.919	41.0941	40.3446	39.6656	39.0528	38.4494	37.8554	37.2705	36.6947	36.1278	35.5696	35.02	34.479	33.9463	33.4218
DVD/Blueray			24.5	23.8006	23.1563	22.5638	22.0199	21.5219	21.067	20.6524	20.2757	19.9345	19.6265	19.3233	19.0248	18.7308	18.4414	18.1565	17.876	17.5998	17.3279	17.0602	16.7966
			719.25	698.719	679.803	662.407	646.442	631.823	618.466	606.296	595.237	585.221	576.179	567.277	558.513	549.884	541.388	533.024	524.788	516.68	508.698	500.838	493.1
Total (TWh)			1046.32	1019.04	998.542	981.969	969.433	960.969	954.042	947.583	944.421	944.415	946.957	937.152	917.51	889.523	854.101	811.886	775.387	743.653	715.912	691.54	670.03
			2010	2011	2012	2013	2014	2015	2016	2017	2018	2019	2020	2021	2022	2023	2024	2025	2026	2027	2028	2029	2030
Share TV&peripherals			0.687409	0.685662	0.680795	0.674571	0.666825	0.657485	0.648259	0.639834	0.630267	0.619665	0.608453	0.60532	0.608726	0.618178	0.633869	0.656525	0.676808	0.694787	0.710559	0.724236	0.735937

## Sheet: Cons Dev Worst
	Numbers	Devices in use at the same time (millions), "long" lifetime and average "high" power consumption
			2010	2011	2012	2013	2014	2015	2016	2017	2018	2019	2020	2021	2022	2023	2024	2025	2026	2027	2028	2029	2030	KWhr/year (2010)			2011	2012	2013	2014	2015	2016	2017	2018	2019	2020	2021	2022	2023	2024	2025	2026	2027	2028	2029	2030
Desktops 7			1022	1024	1029	1030.98	1030	1026.12	1019.4	1009.89	995.652	975.739	956.224	937.1	918.358	899.991	881.991	864.351	847.064	830.123	813.52	797.25	781.305	220	# per Desktop	Best	0.95	0.9025	0.857375	0.814506	0.773781	0.735092	0.698337	0.66342	0.630249	0.598737	0.5688	0.54036	0.513342	0.487675	0.463291	0.440127	0.41812	0.397214	0.377354	0.358486
Monitors 7			1134	1137	1144	1147.62	1147.93	1144.99	1138.87	1129.63	1114.34	1092.05	1070.21	1048.81	1027.83	1007.27	987.129	967.386	948.039	929.078	910.496	892.286	874.441	97	1.05	Expected	0.97	0.9409	0.912673	0.885293	0.858734	0.832972	0.807983	0.783743	0.760231	0.737424	0.715301	0.693842	0.673027	0.652836	0.633251	0.614254	0.595826	0.577951	0.560613	0.543794
Laptops 7			1407	1421	1466	1549	1680	1863	2105	2415.07	2789.65	3223.83	3724.51	4051.64	4221.32	4243.4	4123.01	3861.58	3457.06	2903.93	2439.3	2049.01	1721.17	80		Worst	0.99	0.9801	0.970299	0.960596	0.95099	0.94148	0.932065	0.922745	0.913517	0.904382	0.895338	0.886385	0.877521	0.868746	0.860058	0.851458	0.842943	0.834514	0.826169	0.817907
Smartphones 3			1050	1160	1510	2060	2775	3465	4024.5	4381.98	4601.07	4831.13	5072.68	5237.59	5322.03	5322	5322	5322	5322	5322	5322	5322	5322	5
Tablets 3			150	200	300	457	613	784	946.15	1114.67	1281.87	1474.15	1610.63	1683.43	1683	1683	1683	1683	1683	1683	1683	1683	1683	15
Ord mobile phones 3			3750	3760	3560	3216	2549	2263	2082.8	2179.31	2070.34	1966.83	1868.49	1775.06	1686.31	1601.99	1521.89	1445.8	1373.51	1304.83	1239.59	1177.61	1118.73	1
Phablets 3			0	0	10	60	160	293.333	431.667	565	700	835	970	1118.93	1291.23	1497.83	1737.48	2015.47	2337.95	2712.02	3145.95	3649.3	4233.19	10
TV 10			2500	2503.75	2511.31	2522.73	2538.07	2557.39	2580.75	2608.21	2639.83	2675.68	2715.82	2756.55	2797.9	2839.87	2882.47	2925.7	2969.59	3014.13	3059.35	3105.24	3151.81	200	# per TV set
TV STB 10			950	951.425	954.296	958.636	964.465	971.807	980.684	991.12	1003.14	1016.76	1032.01	1047.49	1063.2	1079.15	1095.34	1111.77	1128.44	1145.37	1162.55	1179.99	1197.69	100	0.38
TV GC 10			500	500.75	502.261	504.545	507.613	511.478	516.15	521.642	527.967	535.136	543.163	551.311	559.58	567.974	576.494	585.141	593.918	602.827	611.869	621.047	630.363	102	0.2
A/V Receiver 10			750	751.125	753.392	756.818	761.42	767.216	774.225	782.463	791.95	802.704	814.745	826.966	839.37	851.961	864.74	877.711	890.877	904.24	917.804	931.571	945.544	65	0.3
DVD/Blueray 10			875	876.312	878.957	882.954	888.323	895.086	903.262	912.873	923.942	936.488	950.535	964.794	979.265	993.954	1008.86	1024	1039.36	1054.95	1070.77	1086.83	1103.14	28	0.35
	TWhr/year
Desktops			224.84	223.027	221.875	220.079	217.671	214.683	211.143	207.082	202.121	196.098	190.254	184.585	179.084	173.747	168.57	163.546	158.673	153.944	149.357	144.906	140.588
Monitors			109.998	109.186	108.76	108.013	106.961	105.621	104.006	102.13	99.7403	96.768	93.8844	91.0866	88.3722	85.7387	83.1837	80.7048	78.2998	75.9665	73.7027	71.5064	69.3755
Laptops			112.56	112.543	114.946	120.239	129.104	141.736	158.545	180.08	205.931	235.602	269.47	290.207	299.337	297.894	286.548	265.695	235.483	195.828	162.851	135.427	112.621
Smartphones			5.25	5.742	7.39975	9.99408	13.3283	16.4759	18.9449	20.4214	21.2281	22.0666	22.9382	23.4471	23.5868	23.3508	23.1173	22.8862	22.6573	22.4307	22.2064	21.9843	21.7645
Tablets			2.25	2.97	4.41045	6.6514	8.83268	11.1836	13.3617	15.5842	17.7426	20.2	21.8494	22.6086	22.3768	22.153	21.9315	21.7122	21.4951	21.2801	21.0673	20.8566	20.6481
Ord ph			3.75	3.7224	3.48916	3.12048	2.44856	2.15209	1.96091	2.03126	1.9104	1.79673	1.68983	1.58928	1.49472	1.40578	1.32214	1.24347	1.16948	1.0999	1.03446	0.972906	0.915018
Phablets			0	0	0.09801	0.582179	1.53695	2.78957	4.06406	5.26617	6.45921	7.62787	8.77251	10.0182	11.4453	13.1437	15.0943	17.3343	19.9067	22.8608	26.2534	30.1494	34.6235
			458.648	457.191	460.88	468.097	478.346	491.851	507.962	527.33	548.674	572.531	600.087	613.524	614.251	604.29	584.672	555.788	517.778	470.549	430.218	395.653	365.911
TV			500	495.743	492.266	489.56	487.611	486.41	485.945	486.204	487.178	488.856	491.227	493.609	496.003	498.409	500.826	503.255	505.696	508.149	510.613	513.09	515.578
TV STB			95	94.1911	93.5306	93.0163	92.6462	92.4179	92.3295	92.3788	92.5639	92.8826	93.3331	93.7858	94.2407	94.6977	95.157	95.6185	96.0823	96.5483	97.0165	97.4871	97.9599
TV GC			51	50.5657	50.2112	49.9351	49.7364	49.6138	49.5664	49.5928	49.6922	49.8633	50.1052	50.3482	50.5924	50.8377	51.0843	51.332	51.581	51.8312	52.0826	52.3352	52.589
A/V Receiver			48.75	48.3349	47.996	47.7321	47.5421	47.425	47.3796	47.4049	47.4999	47.6635	47.8946	48.1269	48.3603	48.5949	48.8306	49.0674	49.3054	49.5445	49.7848	50.0263	50.2689
DVD/Blueray			24.5	24.2914	24.121	23.9884	23.893	23.8341	23.8113	23.824	23.8717	23.9539	24.0701	24.1869	24.3042	24.422	24.5405	24.6595	24.7791	24.8993	25.0201	25.1414	25.2633
			719.25	713.126	708.125	704.232	701.429	699.701	699.031	699.405	700.806	703.219	706.63	710.057	713.501	716.961	720.439	723.933	727.444	730.972	734.517	738.08	741.659
Total (TWh)			1177.9	1170.32	1169.01	1172.33	1179.78	1191.55	1206.99	1226.73	1249.48	1275.75	1306.72	1323.58	1327.75	1321.25	1305.11	1279.72	1245.22	1201.52	1164.74	1133.73	1107.57
			2010	2011	2012	2013	2014	2015	2016	2017	2018	2019	2020	2021	2022	2023	2024	2025	2026	2027	2028	2029	2030
Share TV&peripherals			0.610622	0.609344	0.60575	0.600712	0.594545	0.587218	0.579151	0.570136	0.560878	0.55122	0.540768	0.536467	0.537375	0.542638	0.552014	0.565696	0.584188	0.608372	0.63063	0.651018	0.669627

## Sheet: Production
	Millions of units produced per year
	2010	2011	2012	2013	2014	2015	2016	2017	2018	2019	2020	2021	2022	2023	2024	2025	2026	2027	2028	2029	2030	Best	KWhr/unit (2010), expected	Worst			Efficiency Factor		2011	2012	2013	2014	2015	2016	2017	2018	2019	2020	2021	2022	2023	2024	2025	2026	2027	2028	2029	2030
Desktops	146	148	151	147.98	145.02	142.12	139.278	136.492	133.762	131.087	128.465	125.896	123.378	120.91	118.492	116.122	113.8	111.524	109.293	107.108	104.965	60	215	215			1	Best	0.95	0.9025	0.857375	0.814506	0.773781	0.735092	0.698337	0.66342	0.630249	0.598737	0.5688	0.54036	0.513342	0.487675	0.463291	0.440127	0.41812	0.397214	0.377354	0.358486
Monitors	162	165	169	165.62	162.308	159.061	155.88	152.763	149.707	146.713	143.779	140.903	138.085	135.324	132.617	129.965	127.365	124.818	122.322	119.875	117.478	187	268	334			1	Expected	0.97	0.9409	0.912673	0.885293	0.858734	0.832972	0.807983	0.783743	0.760231	0.737424	0.715301	0.693842	0.673027	0.652836	0.633251	0.614254	0.595826	0.577951	0.560613	0.543794
Laptops	201	215	246	284	332	384	443	511.065	589.588	680.176	784.682	659.133	553.672	465.084	390.671	328.163	275.657	231.552	194.504	163.383	137.242	75	167	167			1	Worst	0.99	0.9801	0.970299	0.960596	0.95099	0.94148	0.932065	0.922745	0.913517	0.904382	0.895338	0.886385	0.877521	0.868746	0.860058	0.851458	0.842943	0.834514	0.826169	0.817907
Smartphones	350	460	700	900	1175	1390	1459.5	1532.48	1609.1	1689.55	1774.03	1774	1774	1774	1774	1774	1774	1774	1774	1774	1774	30	40	60
Tablets	50	100	150	207	256	321	369.15	424.522	488.201	561.431	561	561	561	561	561	561	561	561	561	561	561	78	75	287
Ordinary mobile phones	1250	1260	1050	906	593	764	725.8	689.51	655.034	622.283	591.169	561.61	533.53	506.853	481.511	457.435	434.563	412.835	392.193	372.584	353.954	10	12	15
Phablets	0	0	10	50	100	143.333	188.333	233.333	278.333	323.333	368.333	427.267	495.629	574.93	666.919	773.626	897.406	1040.99	1207.55	1400.76	1624.88	50	60	200
Mobile Broadband Modems	100	112	125.44	140.493	157.352	176.234	197.382	221.068	247.596	277.308	307.812	341.671	379.255	420.973	467.28	518.681	575.736	639.066	709.364	787.394	874.007	5	7	10
Wireless Routers
TV	250	253.75	257.556	261.42	265.341	269.321	273.361	277.461	281.623	285.847	290.135	294.487	298.905	303.388	307.939	312.558	317.246	322.005	326.835	331.738	336.714	250	500	1700		# per TV set	1
TV STB	95	96.425	97.8714	99.3394	100.83	102.342	103.877	105.435	107.017	108.622	110.251	111.905	113.584	115.287	117.017	118.772	120.554	122.362	124.197	126.06	127.951	41	45	50		0.38	1
TV GC	50	50.75	51.5112	52.2839	53.0682	53.8642	54.6722	55.4922	56.3246	57.1695	58.027	58.8974	59.7809	60.6776	61.5878	62.5116	63.4493	64.401	65.367	66.3475	67.3428	150	150	150		0.2	1
A/V Receiver	75	76.125	77.2669	78.4259	79.6023	80.7963	82.0082	83.2384	84.4869	85.7542	87.0406	88.3462	89.6714	91.0164	92.3817	93.7674	95.1739	96.6015	98.0505	99.5213	101.014	100	100	100		0.3	1
DVD/Blueray	87.5	88.8125	90.1447	91.4969	92.8693	94.2624	95.6763	97.1114	98.5681	100.047	101.547	103.071	104.617	106.186	107.779	109.395	111.036	112.702	114.392	116.108	117.85	200	200	200		0.35	1
BEST
	TWhr/year
	2010	2011	2012	2013	2014	2015	2016	2017	2018	2019	2020	2021	2022	2023	2024	2025	2026	2027	2028	2029	2030
Desktops	8.76	8.436	8.17665	7.61246	7.0872	6.59818	6.14291	5.71905	5.32443	4.95705	4.61501	4.29658	4.00011	3.7241	3.46714	3.22791	3.00518	2.79783	2.60478	2.42505	2.25772
Monitors	30.294	29.3122	28.5217	26.5537	24.7215	23.0157	21.4276	19.9491	18.5726	17.2911	16.098	14.9873	13.9532	12.9904	12.094	11.2596	10.4826	9.75935	9.08595	8.45902	7.87535
Laptops	15.075	15.3187	16.6511	21.3	24.9	28.8	33.225	38.3299	44.2191	51.0132	58.8512	49.435	41.5254	34.8813	29.3003	24.6123	20.6743	17.3664	14.5878	12.2537	10.2931
Smartphones	10.5	13.11	18.9525	23.1491	28.7113	32.2667	32.186	32.1055	32.0253	31.9452	31.8653	30.2715	28.758	27.3201	25.9541	24.6564	23.4235	22.2524	21.1397	20.0828	19.0786
Tablets	3.9	7.41	10.5592	13.8432	16.2641	19.3739	21.166	23.1239	25.2628	27.5996	26.1995	24.8896	23.6451	22.4628	21.3397	20.2727	19.2591	18.2961	17.3813	16.5122	15.6866
Ordinary phones	12.5	11.97	9.47625	7.76782	4.83002	5.91169	5.3353	4.81511	4.34563	3.92193	3.53954	3.19444	2.88298	2.60189	2.34821	2.11926	1.91263	1.72615	1.55785	1.40596	1.26888
Phablets	0	0	0.45125	2.14344	4.07253	5.54543	6.92212	8.14727	9.2326	10.189	11.0267	12.1515	13.3909	14.7568	16.262	17.9207	19.7486	21.763	23.9828	26.429	29.1248
Mobile Broadband Modems	0.5	0.532	0.566048	0.602275	0.640821	0.681833	0.725471	0.771901	0.821302	0.873866	0.921491	0.971713	1.02467	1.08052	1.1394	1.2015	1.26698	1.33603	1.40885	1.48563	1.5666
TV	62.5	60.2656	58.1111	56.0337	54.0305	52.0989	50.2363	48.4404	46.7086	45.0388	43.4287	41.8761	40.379	38.9355	37.5435	36.2013	34.9071	33.6592	32.4559	31.2956	30.1768
TV STB	3.895	3.75575	3.62149	3.49202	3.36718	3.2468	3.13073	3.0188	2.91088	2.80682	2.70647	2.60972	2.51642	2.42646	2.33971	2.25607	2.17541	2.09764	2.02265	1.95034	1.88062
TV GC	7.5	7.23187	6.97334	6.72404	6.48365	6.25186	6.02836	5.81285	5.60504	5.40466	5.21144	5.02513	4.84548	4.67226	4.50522	4.34416	4.18886	4.03911	3.89471	3.75547	3.62121
A/V Receiver	7.5	7.23187	6.97334	6.72404	6.48365	6.25186	6.02836	5.81285	5.60504	5.40466	5.21144	5.02513	4.84548	4.67226	4.50522	4.34416	4.18886	4.03911	3.89471	3.75547	3.62121
DVD/Blueray	17.5	16.8744	16.2711	15.6894	15.1285	14.5877	14.0662	13.5633	13.0784	12.6109	12.16	11.7253	11.3061	10.9019	10.5122	10.1364	9.774	9.42458	9.08765	8.76277	8.4495
Networks eq	37.6439	36.9764	36.4651	33.084	30.3234	28.0436	26.1498	24.5284	23.4099	22.4647	21.7206	20.9831	22.3257	23.8648	25.5436	27.4144	29.3912	31.634	34.1764	37.0569	40.3193
Data center eq	21.0432	22.3258	26.0405	24.9712	24.6999	24.428	24.0893	23.8119	23.5319	23.2485	22.9613	22.5944	24.8117	27.1886	29.7144	32.3674	35.166	37.9698	40.6911	43.195	45.2819
Total	239.111	240.751	247.811	249.69	251.744	257.102	256.859	257.95	260.654	264.77	266.517	250.036	240.21	232.48	226.569	222.334	219.564	218.161	217.972	218.825	220.502
EXPECTED
	2010	2011	2012	2013	2014	2015	2016	2017	2018	2019	2020	2021	2022	2023	2024	2025	2026	2027	2028	2029	2030
Desktops	31.39	30.8654	30.5463	29.0373	27.6029	26.2393	24.9431	23.7109	22.5396	21.4261	20.3677	19.3615	18.405	17.4958	16.6315	15.8099	15.0289	14.2865	13.5808	12.9099	12.2721
Monitors	43.416	42.8934	42.6152	40.51	38.5089	36.6065	34.7982	33.0791	31.445	29.8916	28.415	27.0113	25.6769	24.4085	23.2027	22.0565	20.9669	19.9311	18.9465	18.0106	17.1209
Laptops	33.567	34.8278	38.6541	43.2863	49.0842	55.0689	61.6241	68.9596	77.1683	86.3542	96.6335	78.7369	64.1549	52.2734	42.5924	34.7042	28.277	23.0401	18.7731	15.2963	12.4634
Smartphones	14	17.848	26.3452	32.8562	41.6088	47.7456	48.6289	49.5285	50.4448	51.378	52.3285	50.7578	49.2351	47.758	46.3253	44.9355	43.5874	42.2798	41.0114	39.7811	38.5876
Tablets	3.75	7.275	10.5851	14.1692	16.9976	20.674	23.0619	25.7255	28.6968	32.0113	31.0271	30.0963	29.1934	28.3176	27.4681	26.644	25.8447	25.0694	24.3173	23.5878	22.8801
Ord phones	15	14.6664	11.8553	9.92258	6.29974	7.87287	7.25485	6.68535	6.16055	5.67694	5.2313	4.82065	4.44223	4.09351	3.77217	3.47606	3.20318	2.95173	2.72002	2.5065	2.30974
Phablets	0	0	0.56454	2.73802	5.31176	7.38511	9.41258	11.3118	13.0885	14.7485	16.2971	18.3375	20.6333	23.2166	26.1233	29.394	33.0741	37.215	41.8743	47.1169	53.016
TV	125	123.069	121.167	119.295	117.452	115.638	113.851	112.092	110.36	108.655	106.976	105.324	103.696	102.094	100.517	98.9639	97.4349	95.9295	94.4474	92.9882	91.5515
TV STB	4.275	4.20895	4.14392	4.0799	4.01686	3.9548	3.8937	3.83354	3.77432	3.716	3.65859	3.60207	3.54641	3.49162	3.43768	3.38456	3.33227	3.28079	3.2301	3.1802	3.13106
TV GC	2.25	2.21524	2.18101	2.14732	2.11414	2.08148	2.04932	2.01766	1.98648	1.95579	1.92557	1.89582	1.86653	1.8377	1.8093	1.78135	1.75383	1.72673	1.70005	1.67379	1.64793
A/V Receiver	3.375	3.32286	3.27152	3.22097	3.17121	3.12221	3.07398	3.02648	2.97972	2.93369	2.88836	2.84374	2.7998	2.75654	2.71396	2.67202	2.63074	2.5901	2.55008	2.51068	2.47189
DVD/Blueray	3.9375	3.87667	3.81677	3.7578	3.69974	3.64258	3.58631	3.5309	3.47634	3.42263	3.36976	3.31769	3.26643	3.21597	3.16628	3.11736	3.0692	3.02178	2.97509	2.92913	2.88387
Networks eq	71.9563	72.6911	73.7658	73.203	73.4154	74.2168	76.517	78.4948	82.5781	87.6147	93.9894	101.299	115.315	132.186	151.695	174.601	199.528	229.258	264.712	307.002	357.482
Data center eq	34.6594	39.7546	50.1305	52.1801	56.0304	60.1649	64.6045	69.3717	74.4906	79.9873	85.8895	92.2273	104.535	118.484	134.295	152.216	172.529	195.552	221.647	251.225	284.75
Total	386.576	397.514	419.643	430.404	445.314	464.413	477.299	491.368	509.189	529.772	548.998	539.631	546.766	561.629	583.75	613.756	650.26	696.133	752.486	820.718	902.568
WORST
	2010	2011	2012	2013	2014	2015	2016	2017	2018	2019	2020	2021	2022	2023	2024	2025	2026	2027	2028	2029	2030
Desktops	31.39	31.5018	31.8189	30.8707	29.9508	29.0583	28.1923	27.3522	26.5371	25.7463	24.9791	24.2347	23.5125	22.8118	22.132	21.4725	20.8326	20.2118	19.6095	19.0251	18.4582
Monitors	54.108	54.5589	55.3227	53.6741	52.0746	50.5228	49.0172	47.5565	46.1393	44.7644	43.4304	42.1362	40.8805	39.6623	38.4803	37.3336	36.2211	35.1417	34.0945	33.0785	32.0927
Laptops	33.567	35.5459	40.2645	46.0193	53.2593	60.9851	69.6516	79.5498	90.8546	103.766	118.512	98.5545	81.958	68.1562	56.6787	47.134	39.1967	32.5959	27.1068	22.542	18.7459
Smartphones	21	27.324	41.1642	52.3961	67.722	79.3126	82.4454	85.702	89.0872	92.6062	96.2641	95.2998	94.3468	93.4033	92.4693	91.5446	90.6292	89.7229	88.8256	87.9374	87.058
Tablets	14.35	28.413	42.1933	57.6445	70.5769	87.6119	99.7461	113.561	129.289	147.196	145.612	144.156	142.714	141.287	139.874	138.475	137.091	135.72	134.363	133.019	131.689
Ordinary phones	18.75	18.711	15.4366	13.1864	8.5445	10.8983	10.2499	9.64003	9.06644	8.52699	8.01963	7.54247	7.09369	6.67162	6.27465	5.90131	5.55018	5.21995	4.90936	4.61725	4.34253
Phablets	0	0	1.9602	9.70299	19.2119	27.2617	35.4624	43.4964	51.3661	59.0741	66.6228	76.5096	87.8637	100.903	115.877	133.073	152.821	175.499	201.543	231.452	265.8
TV	425	427.061	429.132	431.214	433.305	435.407	437.518	439.64	441.773	443.915	446.068	448.232	450.406	452.59	454.785	456.991	459.207	461.434	463.672	465.921	468.181
TV STB	4.75	4.77304	4.79619	4.81945	4.84282	4.86631	4.88991	4.91363	4.93746	4.96141	4.98547	5.00965	5.03394	5.05836	5.08289	5.10754	5.13232	5.15721	5.18222	5.20735	5.23261
TV GC	2.5	2.51213	2.52431	2.53655	2.54885	2.56122	2.57364	2.58612	2.59866	2.61127	2.62393	2.63666	2.64944	2.66229	2.67521	2.68818	2.70122	2.71432	2.72748	2.74071	2.75401
A/V Receiver	3.75	3.76819	3.78646	3.80483	3.82328	3.84182	3.86046	3.87918	3.89799	3.9169	3.9359	3.95499	3.97417	3.99344	4.01281	4.03227	4.05183	4.07148	4.09123	4.11107	4.13101
DVD/Blueray	4.375	4.39622	4.41754	4.43897	4.46049	4.48213	4.50387	4.52571	4.54766	4.56972	4.59188	4.61415	4.63653	4.65902	4.68161	4.70432	4.72713	4.75006	4.7731	4.79625	4.81951
Networks eq	136.411	141.488	151.121	165.049	183.068	205.309	231.954	263.684	309.938	369.108	446.5	548.358	675.355	847.496	1059.96	1330.49	1591.76	1937.57	2394.83	2999.84	3801.9
Data center eq	49.8022	61.5403	83.6025	94.124	109.358	127.11	147.428	171.523	199.679	232.62	271.209	317.2	372.164	438.007	517.485	614.31	731.567	878.634	1065.48	1306.38	1622.07
Total	799.754	841.593	907.541	969.481	1042.75	1129.23	1207.49	1297.61	1409.71	1543.38	1683.35	1818.44	1992.59	2227.36	2520.47	2893.25	3281.49	3788.44	4451.2	5320.66	6467.28
			2010	2011	2012	2013	2014	2015	2016	2017	2018	2019	2020	2021	2022	2023	2024	2025	2026	2027	2028	2029	2030
		Production Best	239.111	240.751	247.811	249.69	251.744	257.102	256.859	257.95	260.654	264.77	266.517	250.036	240.21	232.48	226.569	222.334	219.564	218.161	217.972	218.825	220.502
		Production Expected	386.576	397.514	419.643	430.404	445.314	464.413	477.299	491.368	509.189	529.772	548.998	539.631	546.766	561.629	583.75	613.756	650.26	696.133	752.486	820.718	902.568
		Production Worst	799.754	841.593	907.541	969.481	1042.75	1129.23	1207.49	1297.61	1409.71	1543.38	1683.35	1818.44	1992.59	2227.36	2520.47	2893.25	3281.49	3788.44	4451.2	5320.66	6467.28
			Figure 5

## Sheet: Future 2030
TWh/year	2010	2011	2012	2013	2014	2015	2016	2017	2018	2019	2020	2021	2022	2023	2024	2025	2026	2027	2028	2029	2030	CAGR								,
Best Case (CAGR 3%)	1538.19	1538.94	1579.17	1542.73	1521.52	1508.75	1494.5	1487.06	1489.56	1497.34	1506.59	1486.99	1544.11	1611.44	1699.67	1810.02	1942.05	2097.29	2275.89	2476.91	2697.64	1.02849
Expected (CAGR 7%)	2037.05	2073.46	2164.36	2190.86	2243.32	2312.15	2391.38	2475.99	2589.26	2723.47	2878.22	3009.91	3259.81	3561.71	3920.27	4350.17	4857.97	5479.99	6237.03	7154.81	8265.05	1.07254
Worst Case (CAGR 13%)	2722.51	2832.23	3022.23	3190.03	3410.17	3676.66	3968.67	4315.18	4764.53	5314.13	5975.6	6752.57	7701.23	8935.16	10448.1	12352	14330.5	16909.6	20302.3	24778.7	30715.2	1.12881
	2010	2011	2012	2013	2014	2015	2016	2017	2018	2019	2020	2021	2022	2023	2024	2025	2026	2027	2028	2029	2030
CO2e Best, Gt	0.962244	0.957573	0.977696	0.94931	0.930595	0.91717	0.902832	0.89266	0.888488	0.887373	0.886971	0.86919	0.896862	0.929983	0.974695	1.03148	1.09986	1.18048	1.27319	1.37723	1.49081											Figure 7
CO2e Expected, Gt	1.27432	1.29051	1.34095	1.34989	1.37484	1.40955	1.45012	1.49331	1.55348	1.62559	1.70922	1.77751	1.91668	2.08581	2.28748	2.53041	2.81841	3.17359	3.60884	4.14047	4.78902
CO2e Worst, Gt	1.70312	1.76395	1.87552	1.97164	2.10014	2.25693	2.4285	2.63323	2.90192	3.23295	3.63396	4.10764	4.69102	5.45972	6.41275	7.62832	8.89795	10.5797	12.8309	15.8566	19.9465
Share of total global electricity	2010	2011	2012	2013	2014	2015	2016	2017	2018	2019	2020	2021	2022	2023	2024	2025	2026	2027	2028	2029	2030
Best Case	0.0793657	0.0772586	0.0769916	0.0733152	0.0704205	0.0679739	0.0655416	0.0634569	0.0618202	0.0604228	0.0591079	0.0567798	0.0572171	0.057929	0.0592387	0.0611245	0.0635112	0.0663861	0.0696932	0.0733502	0.0772349
Expected	0.105106	0.103986	0.105236	0.10361	0.103063	0.103125	0.103508	0.103992	0.105414	0.107409	0.109898	0.111392	0.116459	0.12267	0.129993	0.138652	0.148593	0.160467	0.174377	0.190434	0.208746
Worst Case	0.140473	0.14166	0.146016	0.149095	0.153873	0.159915	0.166312	0.173956	0.184171	0.196434	0.210656	0.22648	0.244827	0.267501	0.29308	0.322428	0.348959	0.380438	0.417172	0.458917	0.505128
Growth rate non-communication technology electricity	Growth rate renewable electricity
1.03	1.05	1.08	1.1
	2010	2011	2012	2013	2014	2015	2016	2017	2018	2019	2020	2021	2022	2023	2024	2025	2026	2027	2028	2029	2030
Total Global Electricity Usage (TWh), Best	19381	19919.3	20510.9	21042.4	21606.2	22196	22802.4	23434.2	24095.1	24781	25488.8	26188.6	26986.8	27817.4	28691.8	29611.9	30578	31592.4	32655.8	33768.2	34927.7
Total Global Electricity Usage (TWh), Expected	19381	19939.8	20566.7	21145.3	21766.4	22420.9	23103.4	23809.4	24562.7	25356.1	26189.8	27020.8	27991.1	29034.9	30157.7	31374.7	32693.2	34150.3	35767.4	37571.1	39593.9
Total Global Electricity Usage (TWh), Worst	19381	19993.1	20697.9	21396	22162.3	22991.3	23862.8	24806.1	25870.2	27053	28366.6	29815.3	31455.8	33402.4	35649.4	38309.3	41066.5	44447.7	48666.5	53993.9	60806.9
Renewable (TWh)	4100	4305	4520.25	4746.26	4983.58	5232.75	5494.39	5769.11	6057.57	6360.45	6678.47	7012.39	7363.01	7731.16	8117.72	8523.61	8949.79	9397.28	9867.14	10360.5	10878.5
Share renewable, best	0.211547	0.216122	0.220383	0.225557	0.230655	0.235752	0.240957	0.246184	0.251403	0.256666	0.262016	0.267765	0.272837	0.277925	0.282928	0.287843	0.292687	0.297454	0.302156	0.306812	0.311458
Share renewable, expected	0.211547	0.215899	0.219785	0.224459	0.228957	0.233387	0.237817	0.242304	0.246617	0.250845	0.255003	0.259518	0.263049	0.266271	0.269176	0.271672	0.273751	0.275174	0.275869	0.275757	0.274753
Share renewable, worst	0.211547	0.215325	0.218392	0.22183	0.224868	0.227597	0.230249	0.232568	0.234152	0.235111	0.235434	0.235194	0.234075	0.231455	0.22771	0.222495	0.217934	0.211423	0.20275	0.191883	0.178903
Share non-renewable electricity, best	15281	15614.3	15990.7	16296.2	16622.6	16963.2	17308	17665	18037.5	18420.6	18810.3	19176.2	19623.8	20086.3	20574.1	21088.3	21628.2	22195.1	22788.7	23407.7	24049.2
Share non-renewable electricity, expected	15281	15634.8	16046.5	16399	16782.8	17188.2	17609	18040.3	18505.1	18995.6	19511.3	20008.4	20628	21303.7	22039.9	22851.1	23743.4	24753	25900.3	27210.6	28715.3
Share non-renewable electricity, worst	15281	15688.1	16177.6	16649.7	17178.7	17758.6	18368.4	19037	19812.6	20692.5	21688.1	22802.9	24092.8	25671.2	27531.6	29785.7	32116.8	35050.4	38799.4	43633.4	49928.3
CO2e intensity of non-renewable, best	0.614993	0.611425	0.608102	0.604066	0.600089	0.596113	0.592053	0.587977	0.583906	0.5798	0.575627	0.571144	0.567187	0.563218	0.559316	0.555482	0.551704	0.547986	0.544319	0.540687	0.537063
CO2e intensity of renewable, best	0.0105774	0.0108061	0.0110191	0.0112778	0.0115327	0.0117876	0.0120479	0.0123092	0.0125701	0.0128333	0.0131008	0.0133882	0.0136419	0.0138963	0.0141464	0.0143922	0.0146343	0.0148727	0.0151078	0.0153406	0.0155729
CO2 intensity of "global" mix, best	0.62557	0.622231	0.619121	0.615344	0.611622	0.607901	0.604101	0.600286	0.596476	0.592634	0.588728	0.584532	0.580829	0.577115	0.573463	0.569874	0.566339	0.562859	0.559426	0.556027	0.552635
CO2e intensity of non-renewable, expected	0.614993	0.611598	0.608568	0.604922	0.601413	0.597958	0.594502	0.591003	0.587639	0.584341	0.581098	0.577576	0.574822	0.572308	0.570043	0.568096	0.566475	0.565364	0.564822	0.56491	0.565693
CO2e intensity of renewable, expected	0.0105774	0.010795	0.0109892	0.011223	0.0114479	0.0116694	0.0118909	0.0121152	0.0123308	0.0125423	0.0127501	0.0129759	0.0131524	0.0133136	0.0134588	0.0135836	0.0136875	0.0137587	0.0137935	0.0137878	0.0137376
CO2 intensity of "global" mix, expected	0.62557	0.622393	0.619557	0.616145	0.612861	0.609627	0.606393	0.603118	0.59997	0.596883	0.593848	0.590552	0.587974	0.585622	0.583501	0.58168	0.580162	0.579123	0.578615	0.578698	0.57943
CO2e intensity of non-renewable, worst	0.614993	0.612047	0.609654	0.606973	0.604603	0.602474	0.600405	0.598597	0.597361	0.596613	0.596361	0.596548	0.597422	0.599465	0.602386	0.606454	0.610012	0.61509	0.621855	0.630332	0.640456
CO2e intensity of renewable, worst	0.0105774	0.0107662	0.0109196	0.0110915	0.0112434	0.0113798	0.0115125	0.0116284	0.0117076	0.0117555	0.0117717	0.0117597	0.0117037	0.0115728	0.0113855	0.0111247	0.0108967	0.0105712	0.0101375	0.00959413	0.00894514
CO2 intensity of "global" mix, worst	0.62557	0.622813	0.620574	0.618064	0.615847	0.613854	0.611918	0.610225	0.609069	0.608369	0.608133	0.608308	0.609126	0.611038	0.613772	0.617579	0.620908	0.625661	0.631992	0.639926	0.649401										Figure 8
Growth rate global greenhouse gas emissions
1.02	Global greenhouse gas emissions, Gigatonnes
Best Case	46	46.8576	47.7957	48.7037	49.64	50.6008	51.5801	52.5835	53.6132	54.6665	55.7417	56.821	57.9677	59.1423	60.3512	61.5956	62.8752	64.1913	65.5443	66.9337	68.3584
Expected	46	47.1905	48.1589	49.1042	50.0843	51.0932	52.1274	53.1842	54.2781	55.4048	56.564	57.7294	58.9876	60.2981	61.664	63.0945	64.5938	66.1845	67.8799	69.697	71.6567
Worst Case	46	47.6639	48.6935	49.726	50.8096	51.9406	53.1058	54.3241	55.6266	57.0121	58.4887	60.0595	61.7619	63.672	65.7893	68.1924	70.6733	73.5906	77.102	81.4131	86.8141
Share of total globally released greenhous gases	2010	2011	2012	2013	2014	2015	2016	2017	2018	2019	2020	2021	2022	2023	2024	2025	2026	2027	2028	2029	2030
Best Case	0.0209183	0.0204358	0.0204557	0.0194916	0.0187469	0.0181256	0.0175035	0.016976	0.0165722	0.0162325	0.0159122	0.015297	0.0154717	0.0157245	0.0161504	0.016746	0.0174927	0.01839	0.0194249	0.020576	0.0218087
Expected	0.0277026	0.0273467	0.0278442	0.0274902	0.0274505	0.0275878	0.0278187	0.0280782	0.0286207	0.0293403	0.0302175	0.0307904	0.032493	0.0345917	0.0370959	0.0401051	0.0436329	0.0479506	0.0531651	0.0594068	0.0668329
Worst Case	0.0370243	0.037008	0.0385168	0.0396501	0.0413335	0.0434522	0.0457295	0.0484726	0.0521679	0.0567064	0.062131	0.0683929	0.0759533	0.0857475	0.0974741	0.111865	0.125903	0.143764	0.166415	0.194767	0.229761
	Best				Expected				Worst
	2010				2010				2010
	Consumer devices Use	770.892	0.501169		Devices Use	1046.32	0.513644		Devices Use	1177.9	0.432652
	Networks Use	338.795	0.220256		Networks Use	407.752	0.200168		Networks Use	545.645	0.20042
	Data Centers Use	189.389	0.123125		Data Centers Use	196.403	0.0964154		Data Centers Use	199.209	0.0731712
	Production	239.111	0.15545		Production	386.576	0.189772		Production	799.754	0.293756
		1538.19				2037.05				2722.51
	2020				2020				2020
	Consumer devices use	568.43	0.377296		Consumer devices use	946.957	0.329008		Consumer devices use	1306.72	0.218675
	Networks Use	326.496	0.216712		Networks Use	722.253	0.250937		Networks Use	1786	0.298882
	Data Centers Use	345.147	0.229091		Data Centers Use	660.01	0.229312		Data Centers Use	1199.53	0.200738
	Production	266.517	0.176901		Production	548.998	0.190742		Production	1683.35	0.281705
		1506.59				2878.22				5975.6
	2030				2030				2030
	Consumer devices use	328.067	0.121613		Consumer devices use	670.03	0.081068		Consumer devices use	1107.57	0.0360593
	Networks Use	1012.24	0.375232		Networks Use	3725.18	0.450715		Networks Use	15207.6	0.495116
	Data Centers Use	1136.83	0.421416		Data Centers Use	2967.27	0.359014		Data Centers Use	7932.78	0.258269
	Production	220.502	0.081739		Production	902.568	0.109203		Production	6467.28	0.210556
		2697.64				8265.05				30715.2
								Figure 6
Figure 6
	2010	2011	2012	2013	2014	2015	2016	2017	2018	2019	2020	2021	2022	2023	2024	2025	2026	2027	2028	2029	2030	Share of global electricity usage in 2010	Share of global electricity usage in 2030	Share WAN of Networks in 2030	FAN+Data Centers of CT in 2030	FAN Wi-Fi share of CT in 2030	Data Centers share of CT in 2030
Consumer devices use	770.892	736.375	708.034	683.626	661.788	641.338	622.55	606.11	592.093	579.78	568.43	547.432	518.795	483.881	453.315	426.348	402.378	380.92	361.583	344.05	328.067	0.0397757	0.00939274
Fixed access wired use	162	178	196.24	197.006	198.274	200.058	202.373	205.234	208.661	212.673	217.293	222.544	255.329	293.604	338.35	390.728	452.115	524.138	608.729	708.174	825.186	0.0083587	0.0236256		0.78405
Fixed access WiFi use	42.1	46.4	51.4	54.6125	58.0258	61.6524	65.5057	69.5998	73.9498	78.5716	83.4823	88.7	94.2437	100.134	106.392	113.042	120.107	127.614	135.59	144.064	153.068	0.00217223	0.00438242			0.0567414
Wireless networks access use	134.695	125.902	116	95.6697	78.7625	64.4703	52.2829	41.2826	34.9695	29.5525	25.7204	20.7671	22.2751	24.6633	26.6635	28.7881	28.7882	29.1666	30.0446	31.581	33.9857	0.00694984	0.000973031	0.0335748
Data centers use	189.389	211.507	259.684	262.127	272.925	284.127	294.934	306.882	319.235	331.99	345.147	357.506	413.253	476.674	548.376	628.776	719.097	817.296	921.97	1030.21	1136.83	0.00977188	0.0325481				0.421416
Production	239.111	240.751	247.811	249.69	251.744	257.102	256.859	257.95	260.654	264.77	266.517	250.036	240.21	232.48	226.569	222.334	219.564	218.161	217.972	218.825	220.502	0.0123374	0.00631311
	2010	2011	2012	2013	2014	2015	2016	2017	2018	2019	2020	2021	2022	2023	2024	2025	2026	2027	2028	2029	2030
Consumer devices use	1046.32	1019.04	998.542	981.969	969.433	960.969	954.042	947.583	944.421	944.415	946.957	937.152	917.51	889.523	854.101	811.886	775.387	743.653	715.912	691.54	670.03	0.0539869	0.0169226
Fixed access wired use	162	178	196.24	213.367	232.984	255.502	285.722	316.228	351.45	392.178	439.335	494.001	588.409	703.203	843.024	1013.59	1221.96	1476.82	1788.89	2171.38	2640.63	0.0083587	0.0666929		0.786009
Fixed access WiFi use	42.1	46.4	51.4	60.138	70.3615	82.3229	98.6414	115.41	135.03	157.985	184.843	216.266	253.031	296.047	346.375	405.258	474.152	554.758	649.067	759.408	888.507	0.00217223	0.0224405			0.107502
Wireless networks access use	203.652	200.256	196.622	181.003	166.579	151.921	136.178	118.873	110.581	102.906	98.0754	92.2293	100.35	113.709	127.329	143.566	144.587	148.81	157.482	172.382	196.045	0.0105078	0.00495141	0.0526271
Data centers use	196.403	232.243	301.916	323.979	358.645	397.02	439.501	486.528	538.586	596.215	660.01	730.631	853.742	997.598	1165.69	1362.11	1591.63	1859.82	2173.2	2539.38	2967.27	0.0101338	0.0749426				0.359014
Production	386.576	397.514	419.643	430.404	445.314	464.413	477.299	491.368	509.189	529.772	548.998	539.631	546.766	561.629	583.75	613.756	650.26	696.133	752.486	820.718	902.568	0.0199461	0.0227957
	2010	2011	2012	2013	2014	2015	2016	2017	2018	2019	2020	2021	2022	2023	2024	2025	2026	2027	2028	2029	2030
Consumer devices use	1177.9	1170.32	1169.01	1172.33	1179.78	1191.55	1206.99	1226.73	1249.48	1275.75	1306.72	1323.58	1327.75	1321.25	1305.11	1279.72	1245.22	1201.52	1164.74	1133.73	1107.57	0.0607759	0.0182146
Fixed access wired use	162	178	196.24	230.258	271.906	323.154	386.515	465.192	563.272	685.977	839.977	1033.8	1278.36	1587.62	1979.43	2476.7	3108.72	3913.02	4937.7	6244.38	7912.04	0.0083587	0.130118		0.663311
Fixed access WiFi use	42.1	46.4	51.4	65.9205	84.543	108.426	139.057	178.341	228.722	293.336	376.203	482.48	618.781	793.586	1017.77	1305.3	1674.04	2146.96	2753.47	3531.33	4528.93	0.00217223	0.0744806			0.147449
Wireless networks access use	341.545	347.267	356.845	364.017	375.821	389.654	402.245	411.204	447.757	497.118	569.82	677.152	804.28	1008.78	1242.64	1539.95	1584.29	1690.31	1888.14	2223.64	2766.64	0.0176227	0.0454988	0.181925
Data centers use	199.209	248.648	341.2	388.021	455.376	534.644	626.368	736.097	865.586	1018.57	1199.53	1417.12	1679.47	1996.56	2382.68	2857.06	3436.77	4169.36	5107.05	6325	7932.78	0.0102786	0.130459				0.258269
Production	799.754	841.593	907.541	969.481	1042.75	1129.23	1207.49	1297.61	1409.71	1543.38	1683.35	1818.44	1992.59	2227.36	2520.47	2893.25	3281.49	3788.44	4451.2	5320.66	6467.28	0.0412648	0.106358
Figure 9a					Figure 9b						Figure 9c

## Sheet: Traffic generated by devices
		2010	2011	2012	2013	2014	2015	2016	2017	2018	2019	2020	2021	2022	2023	2024	2025	2026	2027	2028	2029	2030	2031	2032	2033	2034	2035	2036	2037	2038	2039	2040	2041	2042	2043	2044	2045	2046	2047	2048	2049	2050	2051	2052	2053	2054	2055	2056	2057
	Global population (billions)	6.85438	6.8905	6.92681	6.96331	7	7.03689	7.07397	7.11124	7.14872	7.18639	7.22425	7.26232	7.30059	7.33906	7.37773	7.41661	7.45569	7.49498	7.53447	7.57418	7.61409	7.65421	7.69455	7.73509	7.77585	7.81683	7.85802	7.89942	7.94105	7.9829	8.02496	8.06725	8.10976	8.15249	8.19545	8.23864	8.28205	8.32569	8.36957	8.41367	8.458	8.50257	8.54738	8.59242	8.6377	8.68321	8.72897	8.77496
		9.59613	9.6467	9.69753	9.74863	9.8	9.85164	9.90355	9.95574	10.0082	10.0609	10.114	10.1673	10.2208	10.2747	10.3288	10.3833	10.438	10.493	10.5483	10.6038	10.6597	10.7159
CAGR	1.00527
[201]	http://www.theguardian.com/environment/2014/sep/18/world-population-new-study-11bn-2100
	Penetration = consumers
	1.4
	Personal
	Tablets at the same time 2030		Hours per subscription per day	Bandwidth necessary, Mbps	Yearly ExaBytes																	1.06597
	0.1	8K 3D video	1.5	120	28663.2
	Phablets
	0.3	4K 3D video	1.5	15	10748.7
	Smartphones
	0.1	2K video	1.5	2	477.719
	Ordinary
	0.1
	Mobile broadband modems + Laptop	8K 3D video
	0.02		1.5	120	5732.63
	"Triple play" Wireless router	8K 3D video
	0.02		1.5	120	5732.63
				Total traffic	51354.8	ExaBytes	Sanity check
					0.887449
	BEV electricity in 2030
	Cars 2030	1400000000	#
	Electricity usage BEV 2030	0.2	kWh/km
	Annual Distance per car 2030	18000	km
	Share BEV	0.25
	kWh BEV in 2030	1260000000000
	TWh BEV in 2030	1260
	BEV Share of total global 2030	0.0318231
[truncated: 42 more columns]
